# Supplementary material for: Synthesis, dynamics and redox properties of eight-coordinate zirconium catecholate complexes
Source: Royal Society of Chemistry journal article supplement (doi:10.1039/d0dt02487b), 2020-01-01
Supplement: d0dt02487b1.pdf [file d0dt02487b1.pdf]

## Electronic Supporting Information for

### Synthesis, dynamics and redox properties of eight-coordinate zirconium catecholate complexes

Thomas H. Do and Seth N. Brown\*

251 Nieuwland Science Hall  
Department of Chemistry and Biochemistry  
University of Notre Dame  
Notre Dame, Indiana 46556-5670 USA  
E-mail: [Seth.N.Brown.114@nd.edu](mailto:Seth.N.Brown.114@nd.edu)

#### Contents:

|      |                                                                                                                                                              |     |
|------|--------------------------------------------------------------------------------------------------------------------------------------------------------------|-----|
| I.   | $^1\text{H}$ and $^{13}\text{C}$ NMR Spectra of isolated compounds                                                                                           |     |
|      | <b>Figure S1.</b> $(\text{Xbich}_2)_2\text{Zr}$                                                                                                              | S2  |
|      | <b>Figure S2.</b> $(\text{TPP})\text{Zr}(\text{Xbich}_2)$                                                                                                    | S3  |
| II.  | <b>Figure S3.</b> $^1\text{H}$ NMR spectrum of $(\text{Xbich}_2)\text{Zr}(\text{acac})_2$                                                                    | S4  |
| III. | Fluxionality in $(\text{Xbich}_2)\text{Zr}$ complexes                                                                                                        |     |
|      | <b>A. Figure S4.</b> Variable-temperature $^1\text{H}$ NMR spectra of $(\text{TPP})\text{Zr}(\text{Xbich}_2)$                                                | S5  |
|      | <b>B. Figure S5.</b> Overlay of VT $^1\text{H}$ NMR spectra of $(\text{TPP})\text{Zr}(\text{Xbich}_2)$ and $(\text{TPP})\text{Zr}(\text{Xbich}_2\text{D}_2)$ | S6  |
|      | <b>C. Table S1.</b> Calculated $k$ values for ring twisting in $(\text{TPP})\text{Zr}(\text{Xbich}_2)$ and $(\text{TPP})\text{Zr}(\text{Xbich}_2\text{D}_2)$ | S6  |
|      | <b>D. Figure S6.</b> Calculated free energy landscape for net ligand rotation in $(\text{Xbich}_2)_2\text{Zr}$                                               | S7  |
| IV.  | Comparison of $(\text{TPP})\text{Zr}(\text{OAc})_2$ and $(\text{TPP})\text{Zr}(\text{Xbich}_2)$                                                              |     |
|      | <b>A. Figure S7.</b> UV-visible spectra of $(\text{TPP})\text{Zr}(\text{OAc})_2$ and $(\text{TPP})\text{Zr}(\text{Xbich}_2)$                                 | S8  |
|      | <b>B. Figure S8.</b> Cyclic Voltammogram of $(\text{TPP})\text{Zr}(\text{OAc})_2$ and $(\text{TPP})\text{Zr}(\text{Xbich}_2)$                                | S9  |
| V.   | Redox titrations                                                                                                                                             |     |
|      | <b>A. Figure S9.</b> Redox titration of $(\text{TPP})\text{Zr}(\text{Xbich}_2)$                                                                              | S10 |
|      | <b>B. Figure S10.</b> Redox titration of $(\text{Xbich}_2)_2\text{Zr}$                                                                                       | S11 |
| VI.  | Computational data (Cartesian coordinates, optimized energies, imaginary frequencies)                                                                        |     |
|      | <b>A.</b> $(\text{Por})_2\text{Zr}$ , ground state                                                                                                           | S12 |
|      | <b>B.</b> $(\text{Por})_2\text{Zr}$ , twist transition state                                                                                                 | S14 |
|      | <b>C.</b> $(\text{Por})\text{Zr}(\kappa^4\text{-Xbich}_2)$ , 8-coordinate ground state                                                                       | S16 |
|      | <b>D.</b> $(\text{Por})\text{Zr}(\kappa^3\text{-Xbich}_2)$ , NH tautomer                                                                                     | S19 |
|      | <b>E.</b> $(\text{Por})\text{Zr}(\kappa^3\text{-Xbich}_2)$ , OH tautomer                                                                                     | S22 |
|      | <b>F.</b> $(\text{Por})\text{Zr}(\kappa^3\text{-Xbich}_2)$ , tautomerization transition state                                                                | S25 |
|      | <b>G.</b> $(\text{Por})\text{Zr}(\kappa^3\text{-Xbich}_2)$ , NH tautomer, twist transition state                                                             | S28 |
|      | <b>H.</b> $(\text{Por})\text{Zr}(\kappa^3\text{-Xbich}_2)$ , OH tautomer, twist transition state                                                             | S31 |
|      | <b>I.</b> $(\text{Xbich}_2)_2\text{Zr}$ , ground state                                                                                                       | S34 |
|      | <b>J.</b> $(\text{Xbich}_2)_2\text{Zr}$ , OH tautomer                                                                                                        | S37 |
|      | <b>K.</b> $(\text{Xbich}_2)_2\text{Zr}$ , twist transition state                                                                                             | S40 |
|      | <b>L.</b> $(\text{Xbich}_2)_2\text{Zr}$ , OH tautomer, twist transition state                                                                                | S43 |

I.  $^1\text{H}$  and  $^{13}\text{C}$  NMR SpectraFigure S1.  $^1\text{H}$  and  $^{13}\text{C}$  NMR of  $(\text{XbicH}_2)_2\text{Zr}$  $^1\text{H}$  NMR ( $\text{CD}_2\text{Cl}_2$ , 500 MHz):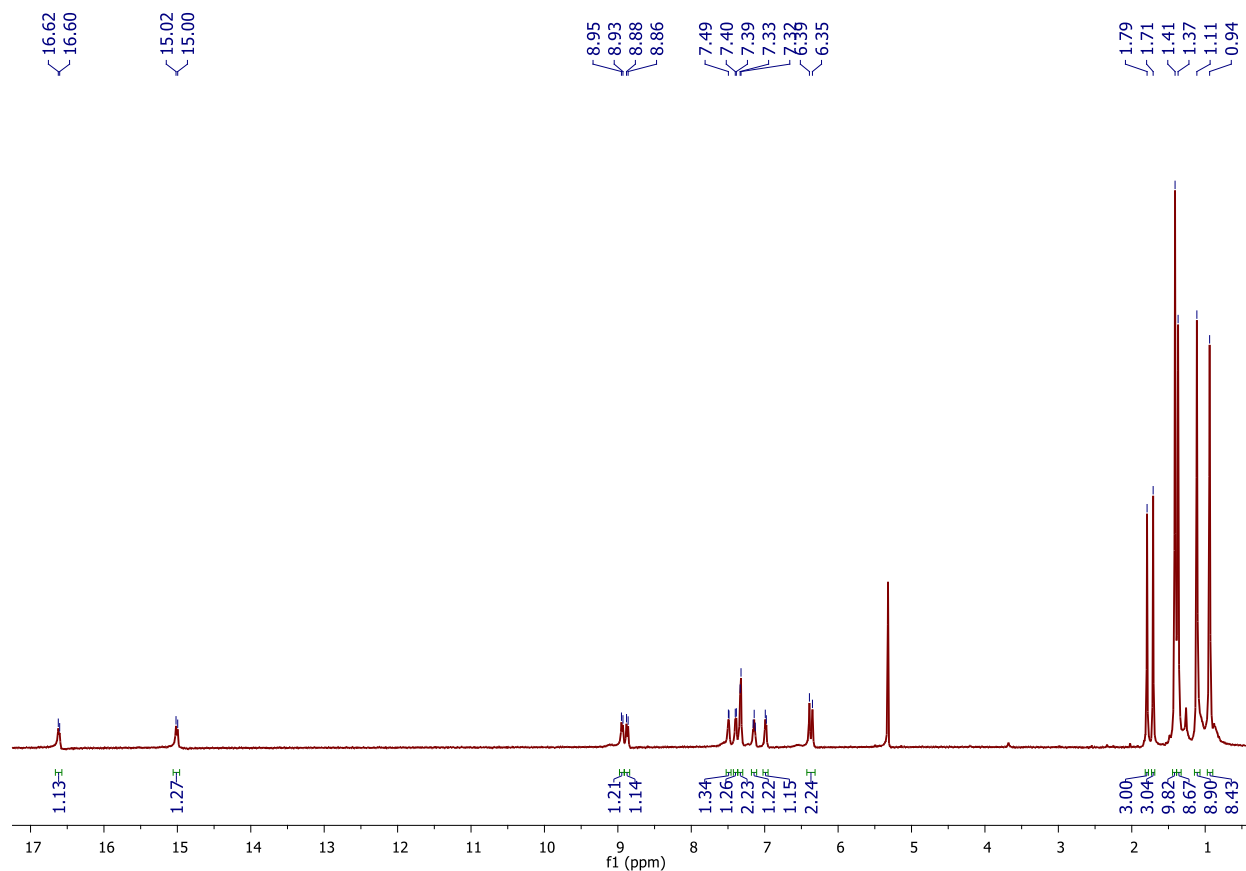 $^{13}\text{C}$  NMR ( $\text{C}_6\text{D}_6$ ):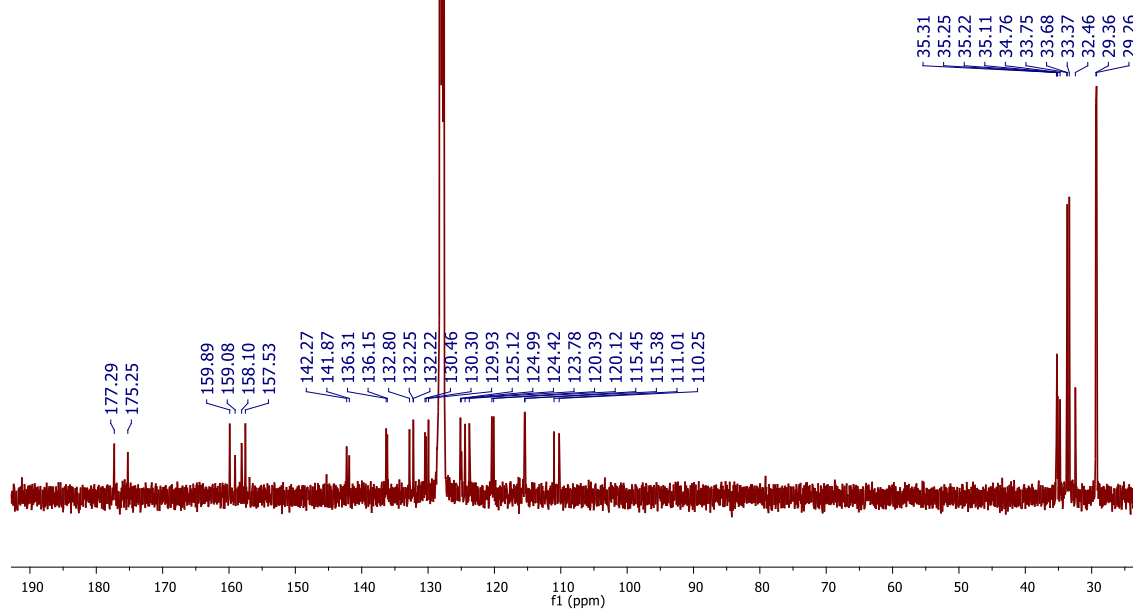

**Figure S2.**  $^1\text{H}$  and  $^{13}\text{C}$  NMR of  $(\text{TPP})\text{Zr}(\text{XbicH}_2)$  $^1\text{H}$  NMR (400 MHz,  $\text{THF-d}_8$ ,  $-58\text{ }^\circ\text{C}$ ):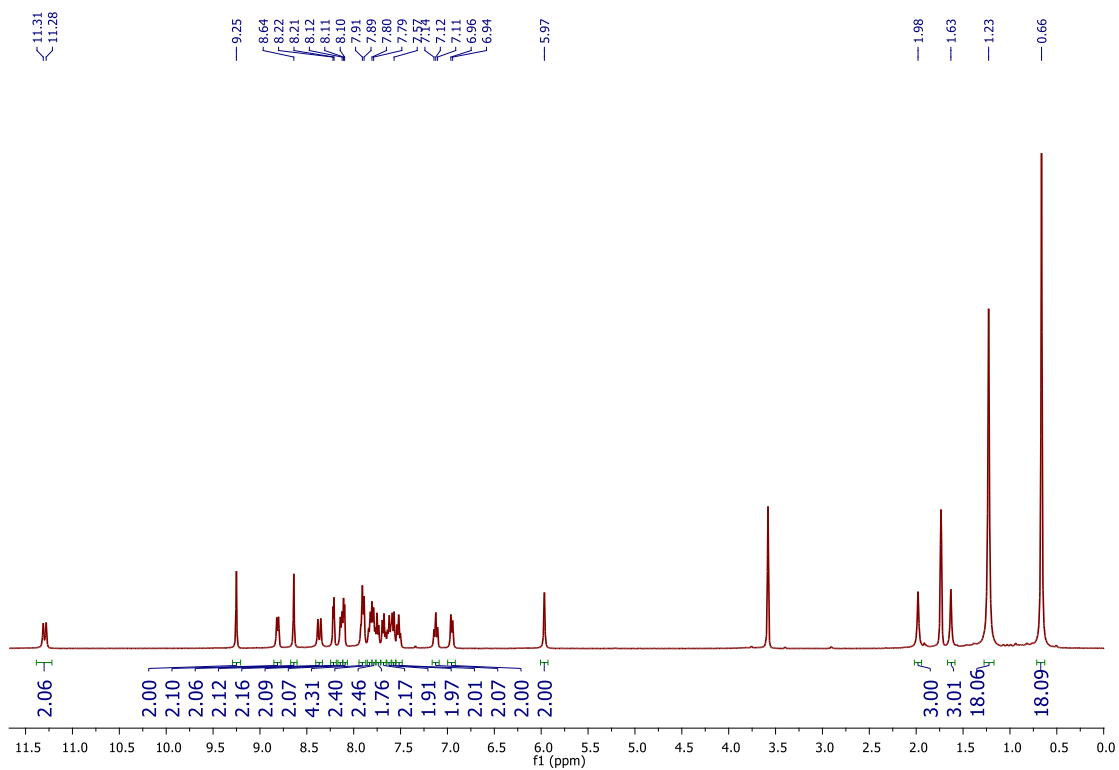 $^{13}\text{C}$  NMR ( $\text{CDCl}_3$ ,  $-58\text{ }^\circ\text{C}$ ):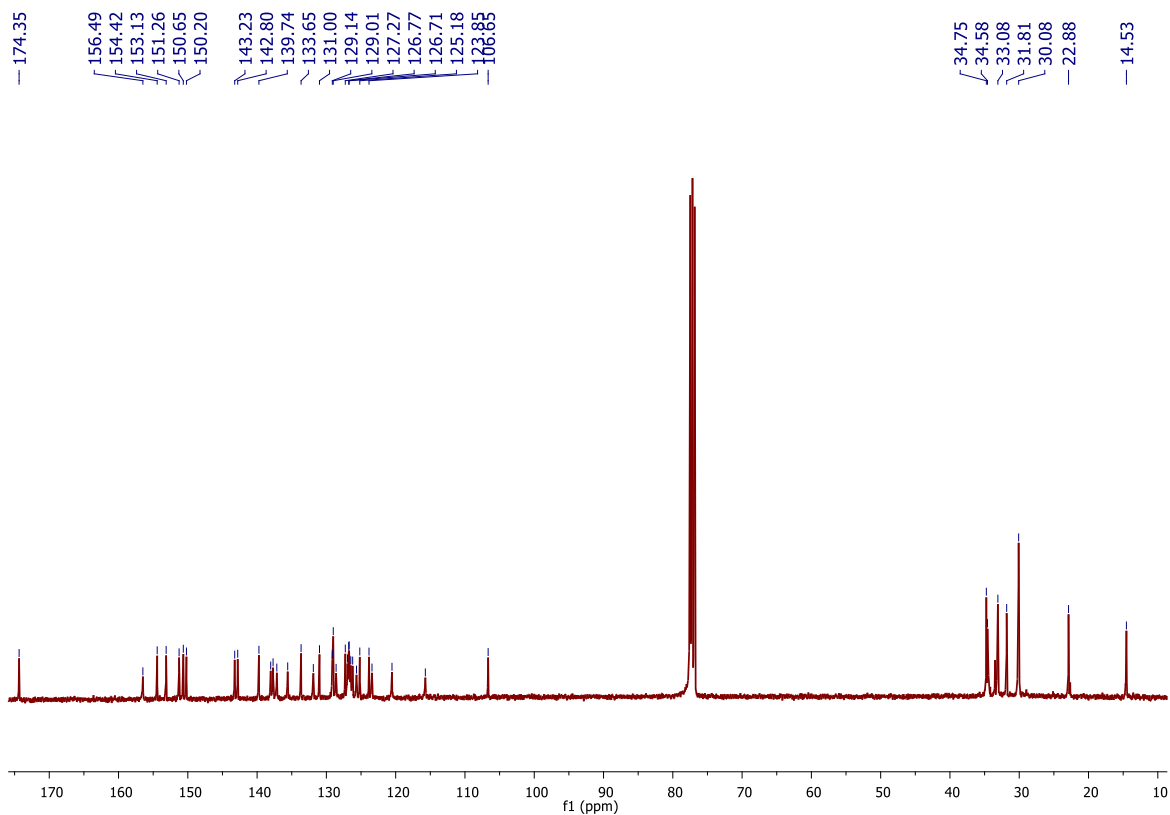

II. **Figure S3.**  $^1\text{H}$  NMR spectrum of  $(\text{Xbich}_2)\text{Zr}(\text{acac})_2$  (500 MHz,  $\text{CD}_2\text{Cl}_2$ ).

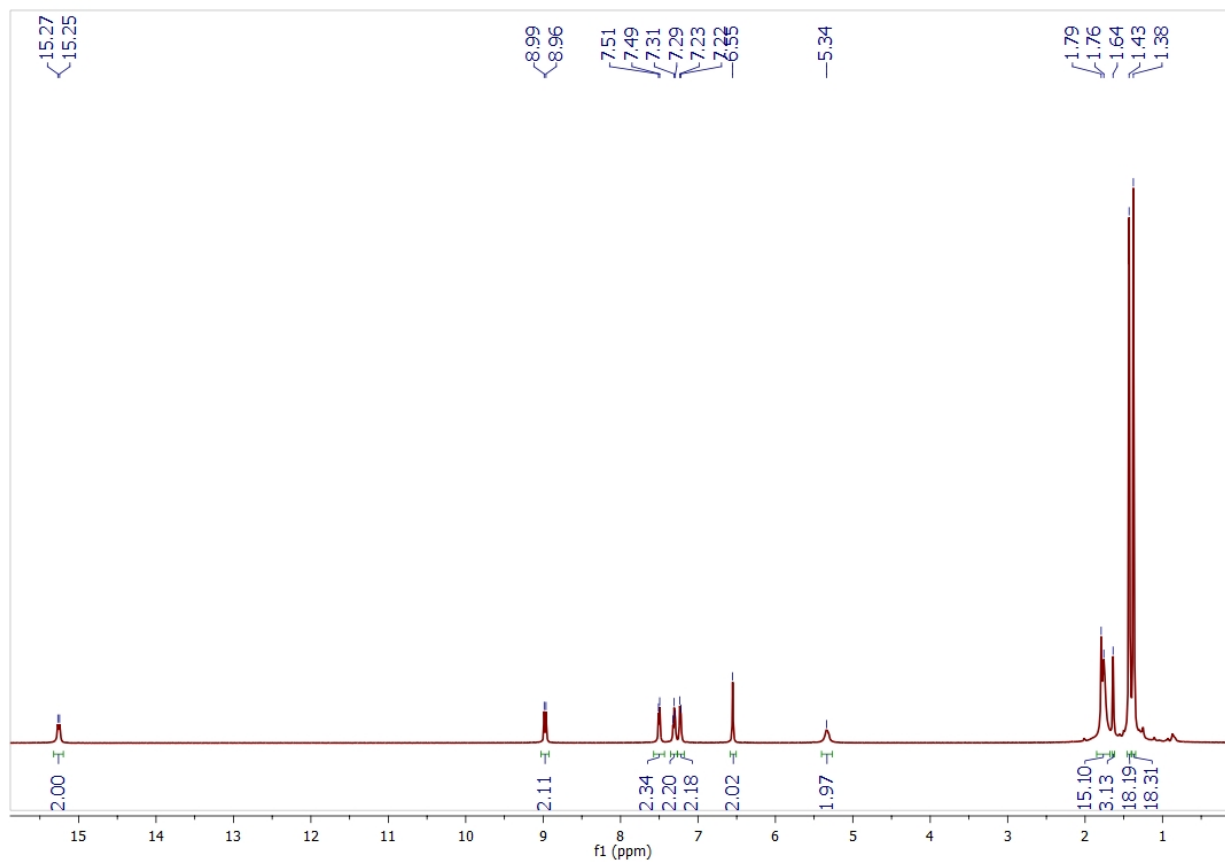

III. Fluxionality of (XbicH<sub>2</sub>)Zr complexes

A. **Figure S4.** Variable-temperature <sup>1</sup>H NMR spectra (400 MHz, THF-*d*<sub>8</sub>, aromatic region) of (TPP)Zr(XbicD<sub>2</sub>).

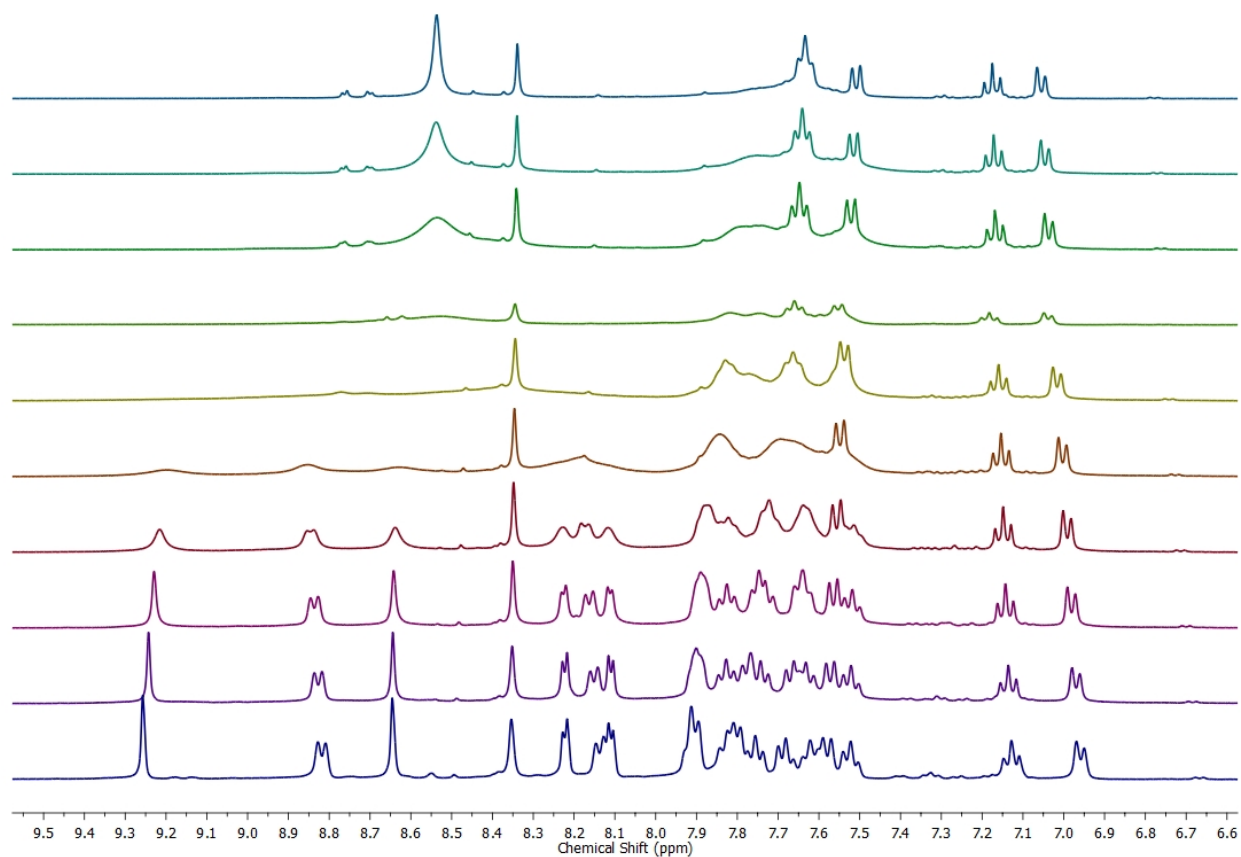

- B. **Figure S5.** Overlay of variable-temperature  $^1\text{H}$  NMR spectra (400 MHz,  $\text{THF-}d_8$ , aromatic region) of  $(\text{TPP})\text{Zr}(\text{XbicH}_2)$  (blue) and  $(\text{TPP})\text{Zr}(\text{XbicD}_2)$  (red).

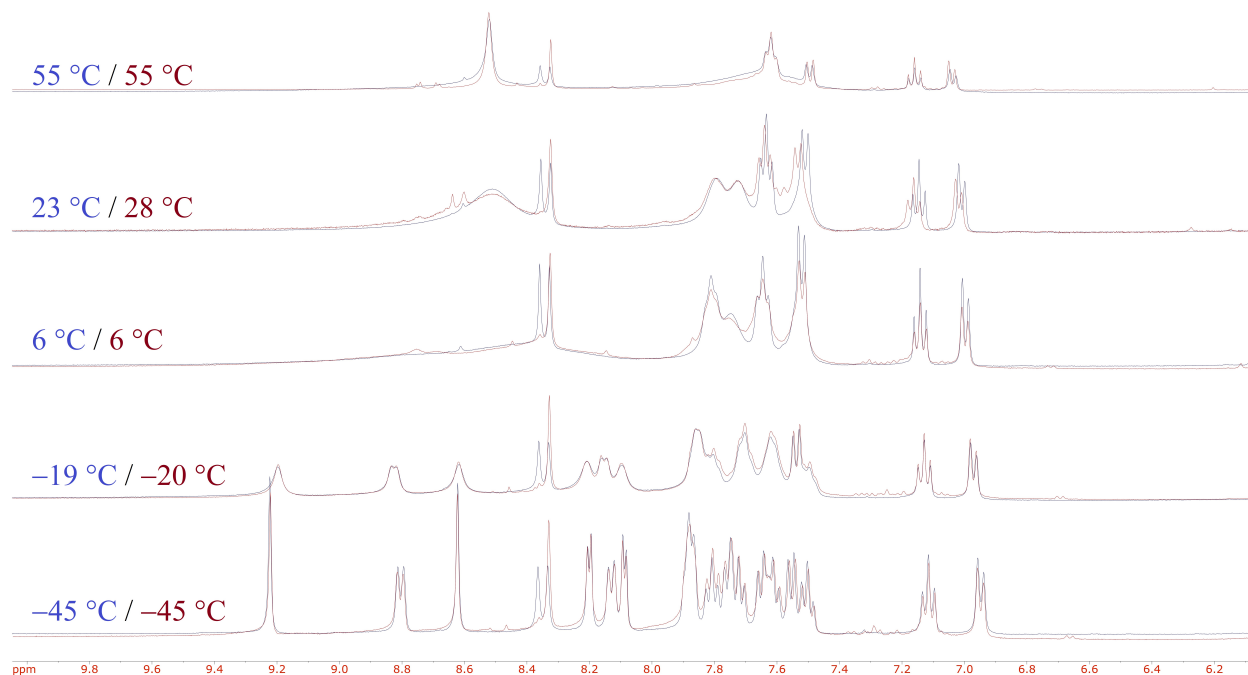

- C. **Table S1.** Calculated  $k$  values for ring twisting in  $(\text{TPP})\text{Zr}(\text{XbicH}_2)$  (blue) and  $(\text{TPP})\text{Zr}(\text{XbicD}_2)$  (red) ( $\text{THF-}d_8$ ).

| $T / \text{K}$ | $k_{\text{H}} / \text{s}^{-1}$ | $k_{\text{D}} / \text{s}^{-1}$ | $k_{\text{H}}/k_{\text{D}}$ |
|----------------|--------------------------------|--------------------------------|-----------------------------|
| 266.6          | 79                             | 75                             | 1.06                        |
| 279.3          | 310                            | 290                            | 1.07                        |
| 306.2          | 2390                           | 2390                           | 1.00                        |
| 317.5          | 6440                           | 6200                           | 1.04                        |
| 328.8          | 23200                          | 25000                          | 0.93                        |

**Average  $k_{\text{H}}/k_{\text{D}} = 1.02(6)$**

D. **Figure S6.** Calculated free energy landscape (B3LYP, SDD/6-31G\*) for net ligand rotation in  $(\text{XbicH}_2)_2\text{Zr}$ .  $\text{Zr} = \kappa^4\text{-(XbicH}_2\text{)Zr}$ .

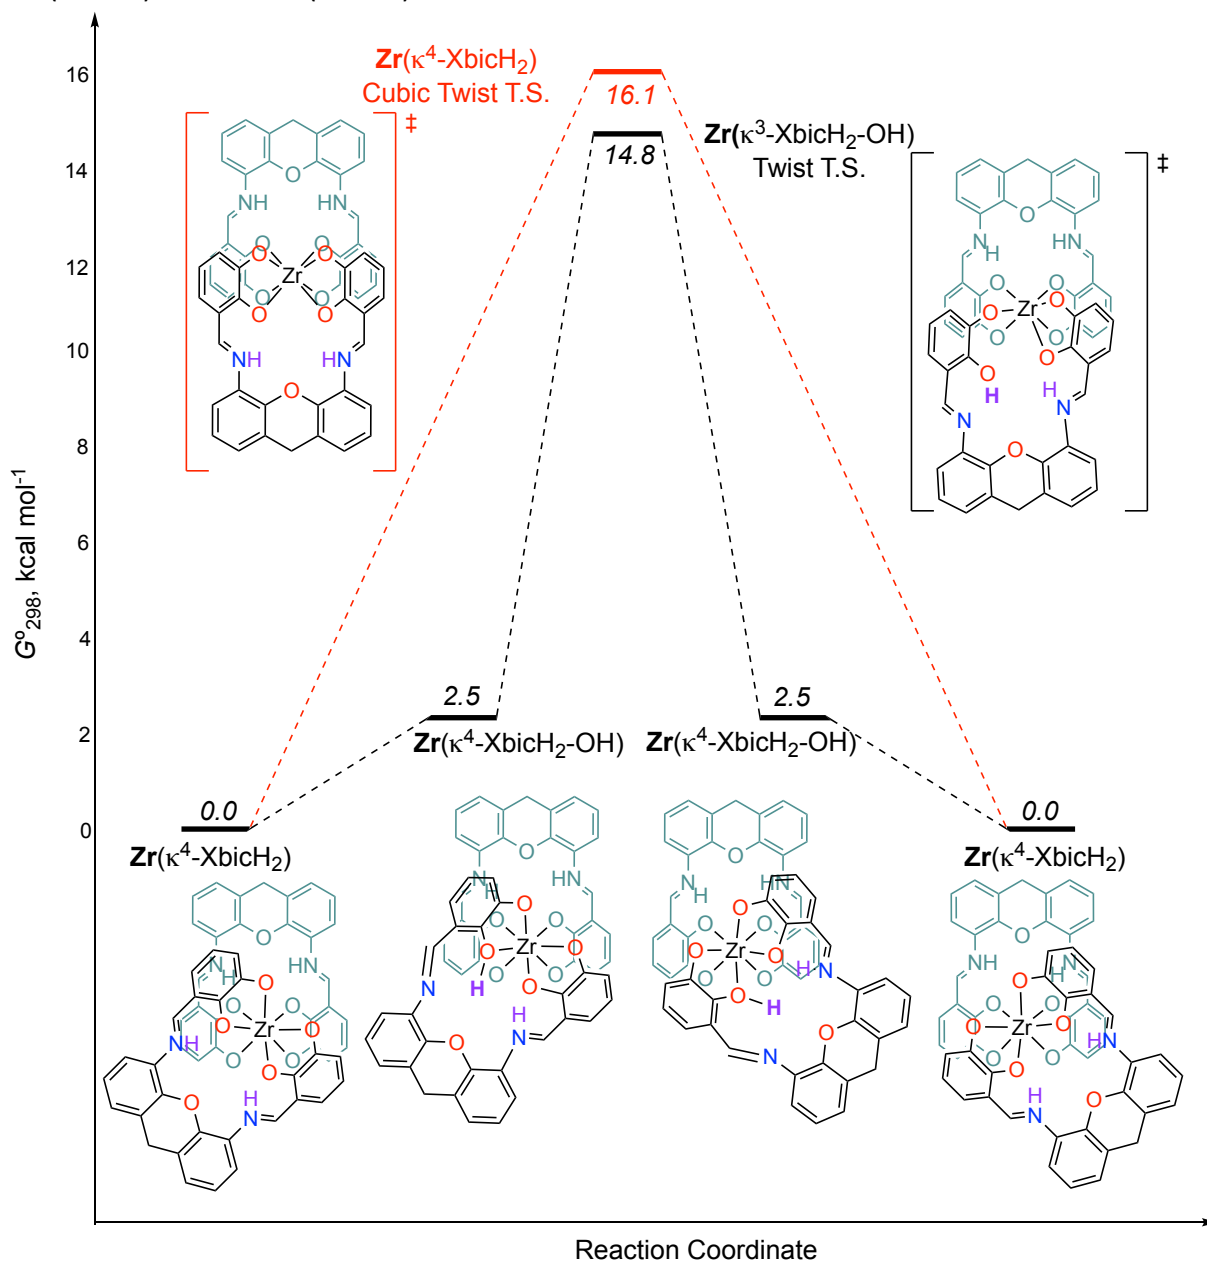

IV. Comparison of (TPP)Zr(OAc)<sub>2</sub> and (TPP)Zr(XbicH<sub>2</sub>)A. **Figure S7.** UV-visible spectra of (TPP)Zr(OAc)<sub>2</sub> (**black**) and (TPP)Zr(XbicH<sub>2</sub>) (**blue**) (CH<sub>2</sub>Cl<sub>2</sub>).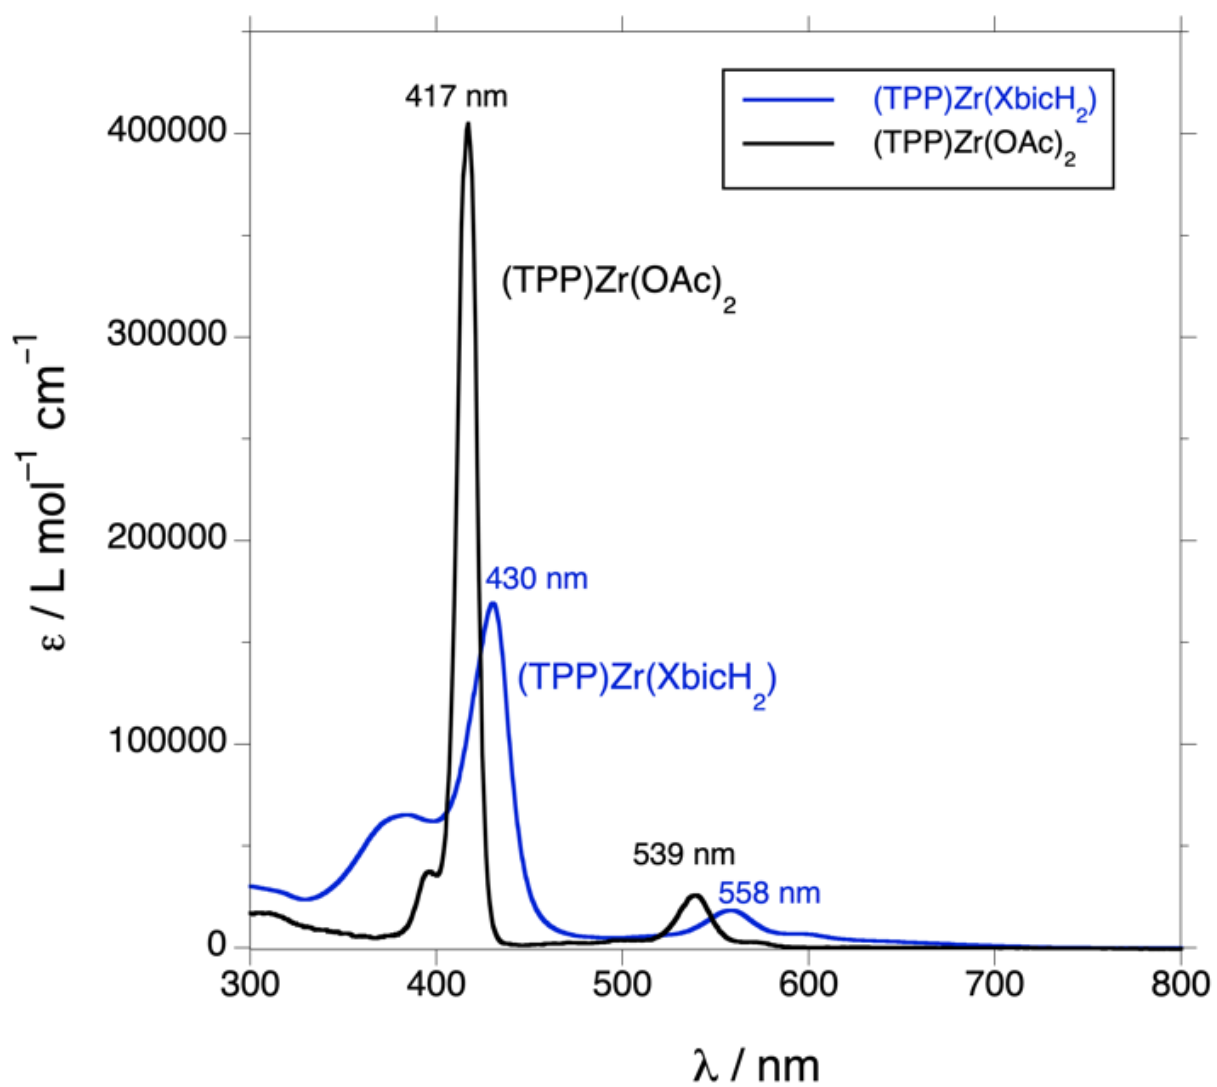



B. **Figure S8.** Cyclic voltammogram of (TPP)Zr(OAc)<sub>2</sub> (black) and (TPP)Zr(XbichH<sub>2</sub>) (blue).

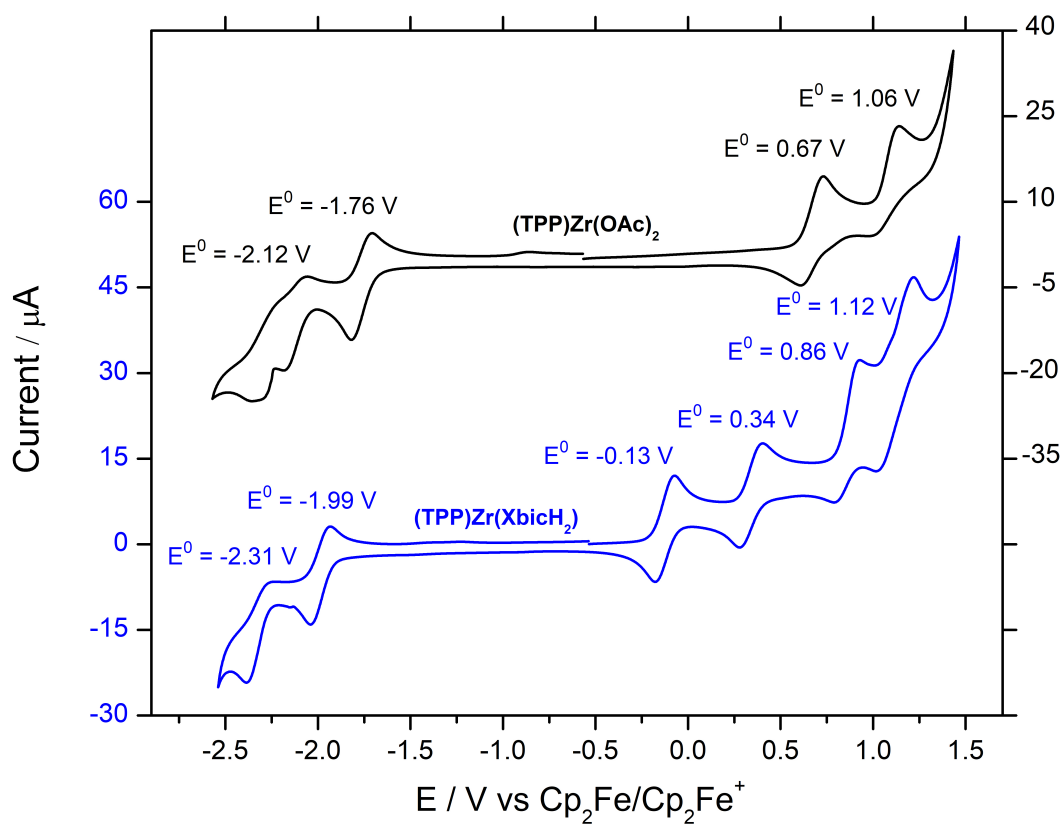

## V. Redox titrations

**A. Figure S9.** Redox Titration of  $(\text{TPP})\text{Zr}(\text{Xbich}_2)$  with  $\text{AgPF}_6$  in  $\text{CH}_2\text{Cl}_2$  to generate first  $[(\text{TPP})\text{Zr}(\text{Xbich}_2)]^+$  and then to generate  $[(\text{TPP})\text{Zr}(\text{Xbich}_2)]^{2+}$ . The initial spectrum is dark blue, with light blue spectra taken after aliquots of oxidant addition until 1.0 equiv, shown in red. Additions after 1.0 equiv are given in light red, with the final spectrum at 2.0 equiv oxidant shown in black. The concentration of  $(\text{TPP})\text{Zr}(\text{Xbich}_2)$  is  $1.59 \times 10^{-5}$  M in the main spectra and  $6.34 \times 10^{-5}$  M in the inset spectra.

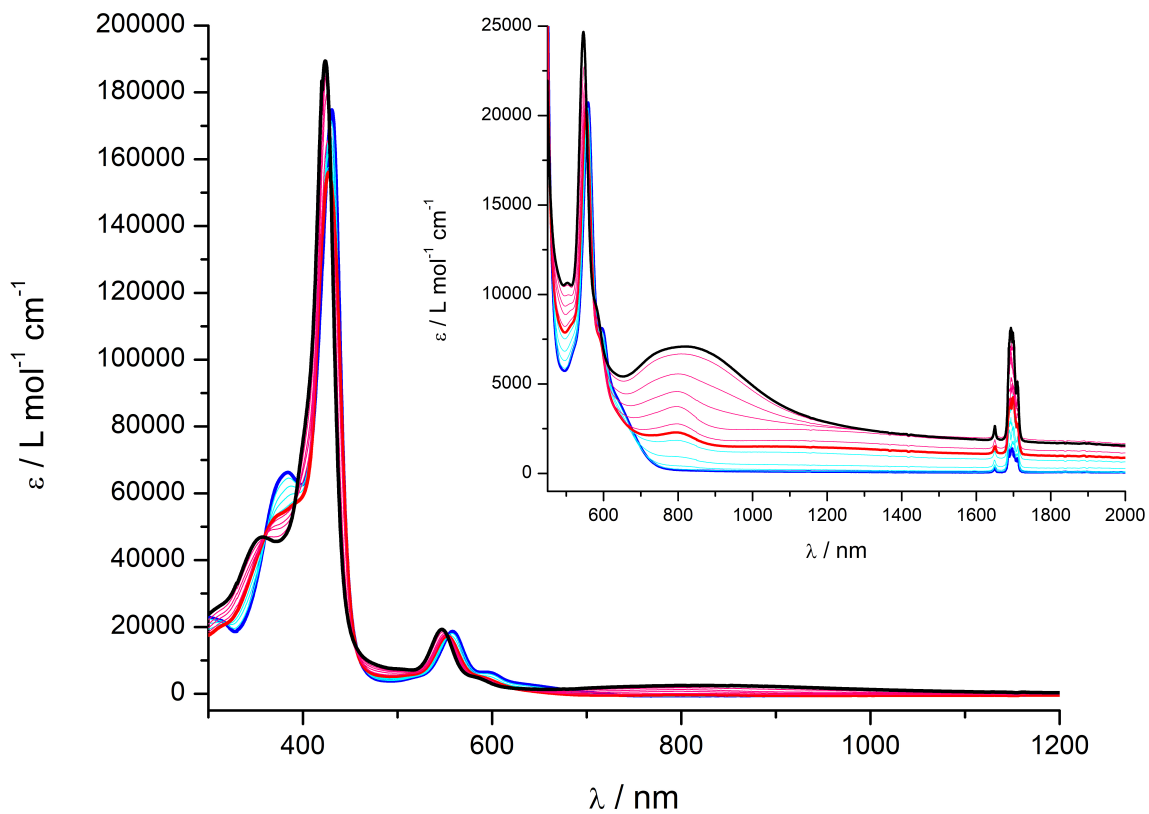

- B. Figure S10.** Redox Titration of  $(\text{Xbich}_2)_2\text{Zr}$  ( $3.80 \times 10^{-5} \text{ M}$ ;  $1.14 \times 10^{-4} \text{ M}$  (expansion)) with  $\text{AcFcPF}_6$  in  $\text{CH}_2\text{Cl}_2$  to generate  $[(\text{Xbich}_2)_2\text{Zr}]^+$  and then to generate  $[(\text{Xbich}_2)_2\text{Zr}]^{2+}$ . The initial spectrum is dark blue, with light blue spectra taken after aliquots of oxidant addition until 1.0 equiv, shown in red. Additions after 1.0 equiv are given in light red, with the final spectrum at 2.0 equiv oxidant shown in black. The concentration of  $(\text{Xbich}_2)_2\text{Zr}$  is  $3.80 \times 10^{-5} \text{ M}$  in the main spectra and  $1.14 \times 10^{-4} \text{ M}$  in the inset spectra.

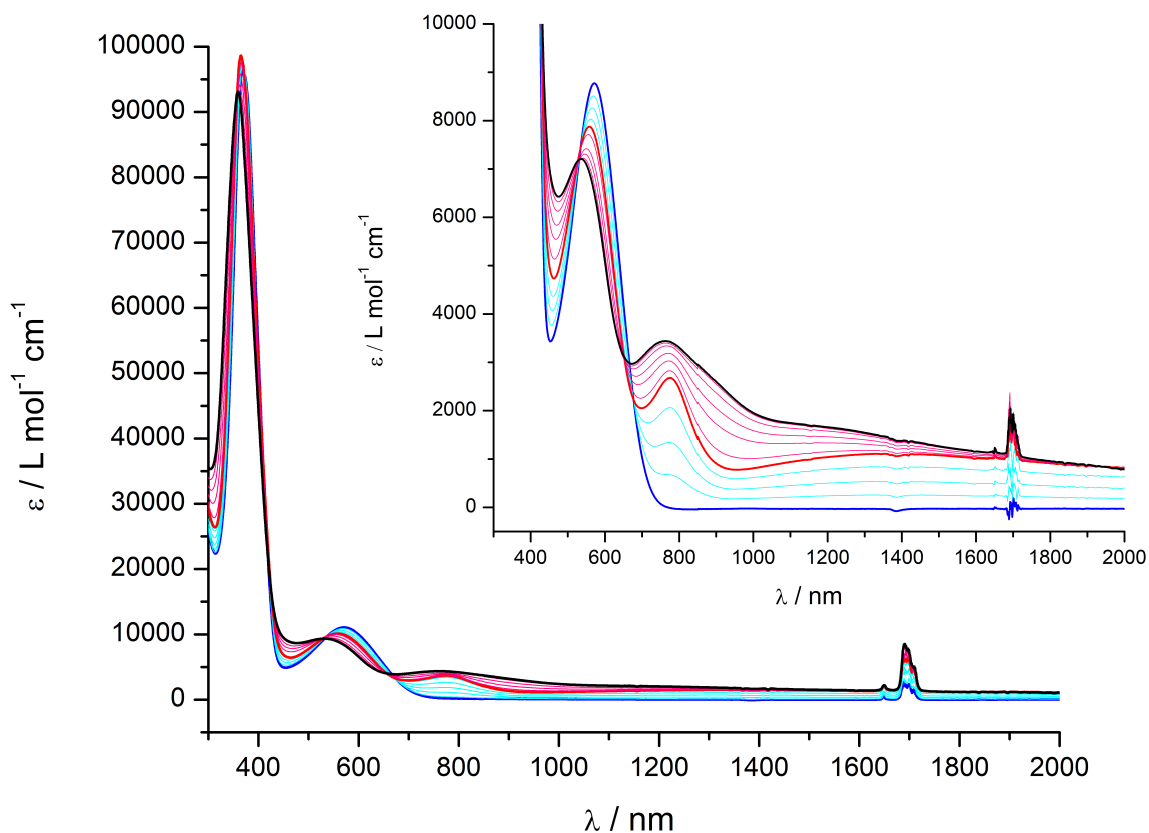

## VI. Computational data (Cartesian coordinates, optimized energies, imaginary frequencies)

A. (Por)<sub>2</sub>Zr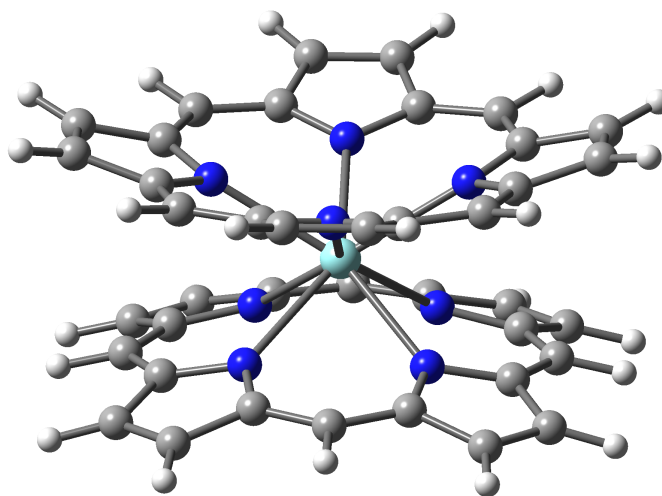

Optimized energy = -2023.94867302 a. u.

| Center Number | Atomic Number | Coordinates (Å) |           |           |
|---------------|---------------|-----------------|-----------|-----------|
|               |               | X               | Y         | Z         |
| 1             | 40            | 0.000000        | 0.000000  | 0.000387  |
| 2             | 6             | -1.357919       | 0.784076  | -3.041107 |
| 3             | 6             | -1.279822       | 1.744726  | -4.113809 |
| 4             | 1             | -1.665969       | 1.585019  | -5.112885 |
| 5             | 6             | -0.705363       | 2.863119  | -3.593199 |
| 6             | 1             | -0.520345       | 3.815384  | -4.074554 |
| 7             | 6             | -0.435412       | 2.579823  | -2.205235 |
| 8             | 6             | -0.001462       | 3.545647  | -1.306989 |
| 9             | 1             | 0.236050        | 4.524426  | -1.713053 |
| 10            | 6             | -0.000000       | 3.420367  | 0.075853  |
| 11            | 6             | 0.162840        | 4.543540  | 0.965600  |
| 12            | 1             | 0.377573        | 5.555868  | 0.646523  |
| 13            | 6             | -0.072391       | 4.080502  | 2.223451  |
| 14            | 1             | -0.091468       | 4.632365  | 3.155025  |
| 15            | 6             | -0.378394       | 2.677054  | 2.095409  |
| 16            | 6             | -0.839623       | 1.904586  | 3.153057  |
| 17            | 1             | -0.861609       | 2.373400  | 4.132344  |
| 18            | 6             | -1.425584       | 0.650717  | 3.041392  |
| 19            | 6             | -2.164211       | 0.030822  | 4.113682  |
| 20            | 1             | -2.258472       | 0.438305  | 5.112581  |
| 21            | 6             | -2.743206       | -1.085108 | 3.592690  |
| 22            | 1             | -3.412803       | -1.787139 | 4.073861  |
| 23            | 6             | -2.354662       | -1.141529 | 2.205091  |
| 24            | 6             | -2.889006       | -2.055636 | 1.306878  |
| 25            | 1             | -3.548852       | -2.816823 | 1.712492  |
| 26            | 6             | -2.785102       | -1.984917 | -0.075970 |
| 27            | 6             | -3.604347       | -2.770293 | -0.965764 |
| 28            | 1             | -4.303264       | -3.533418 | -0.646589 |
| 29            | 6             | -3.364421       | -2.309660 | -2.223602 |
| 30            | 1             | -3.824855       | -2.614698 | -3.155098 |
| 31            | 6             | -2.400054       | -1.245119 | -2.095601 |
| 32            | 6             | -2.039305       | -0.420554 | -3.153009 |

|    |   |           |           |           |
|----|---|-----------|-----------|-----------|
| 33 | 1 | -2.433923 | -0.674155 | -4.132412 |
| 34 | 7 | -0.796116 | 1.288028  | -1.887775 |
| 35 | 7 | -0.285798 | 2.271387  | 0.781476  |
| 36 | 7 | -1.510431 | -0.099276 | 1.888086  |
| 37 | 7 | -2.015806 | -1.084973 | -0.781627 |
| 38 | 6 | 1.357919  | -0.784076 | -3.041107 |
| 39 | 6 | 1.279822  | -1.744726 | -4.113809 |
| 40 | 1 | 1.665969  | -1.585019 | -5.112885 |
| 41 | 6 | 0.705363  | -2.863119 | -3.593199 |
| 42 | 1 | 0.520345  | -3.815384 | -4.074554 |
| 43 | 6 | 0.435412  | -2.579823 | -2.205235 |
| 44 | 6 | 0.001462  | -3.545647 | -1.306989 |
| 45 | 1 | -0.236050 | -4.524426 | -1.713053 |
| 46 | 6 | -0.000000 | -3.420367 | 0.075853  |
| 47 | 6 | -0.162840 | -4.543540 | 0.965600  |
| 48 | 1 | -0.377573 | -5.555868 | 0.646523  |
| 49 | 6 | 0.072391  | -4.080502 | 2.223451  |
| 50 | 1 | 0.091468  | -4.632365 | 3.155025  |
| 51 | 6 | 0.378394  | -2.677054 | 2.095409  |
| 52 | 6 | 0.839623  | -1.904586 | 3.153057  |
| 53 | 1 | 0.861609  | -2.373400 | 4.132344  |
| 54 | 6 | 1.425584  | -0.650717 | 3.041392  |
| 55 | 6 | 2.164211  | -0.030822 | 4.113682  |
| 56 | 1 | 2.258472  | -0.438305 | 5.112581  |
| 57 | 6 | 2.743206  | 1.085108  | 3.592690  |
| 58 | 1 | 3.412803  | 1.787139  | 4.073861  |
| 59 | 6 | 2.354662  | 1.141529  | 2.205091  |
| 60 | 6 | 2.889006  | 2.055636  | 1.306878  |
| 61 | 1 | 3.548852  | 2.816823  | 1.712492  |
| 62 | 6 | 2.785102  | 1.984917  | -0.075970 |
| 63 | 6 | 3.604347  | 2.770293  | -0.965764 |
| 64 | 1 | 4.303264  | 3.533418  | -0.646589 |
| 65 | 6 | 3.364421  | 2.309660  | -2.223602 |
| 66 | 1 | 3.824855  | 2.614698  | -3.155098 |
| 67 | 6 | 2.400054  | 1.245119  | -2.095601 |
| 68 | 6 | 2.039305  | 0.420554  | -3.153009 |
| 69 | 1 | 2.433923  | 0.674155  | -4.132412 |
| 70 | 7 | 0.796116  | -1.288028 | -1.887775 |
| 71 | 7 | 0.285798  | -2.271387 | 0.781476  |
| 72 | 7 | 1.510431  | 0.099276  | 1.888086  |
| 73 | 7 | 2.015806  | 1.084973  | -0.781627 |

---

**B. (Por)<sub>2</sub>Zr, twist transition state**

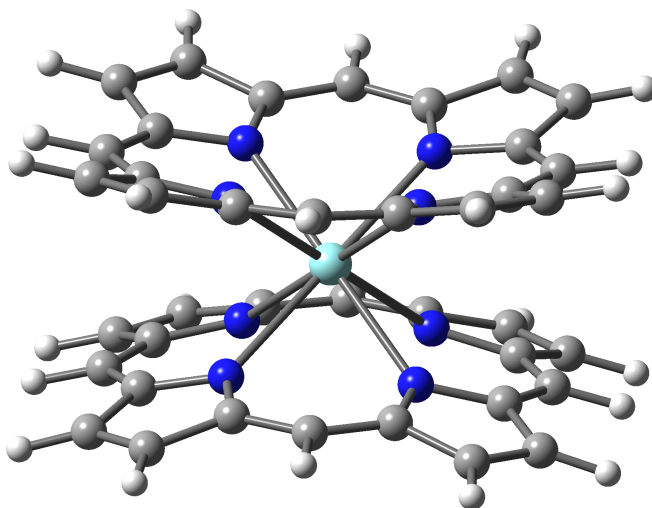

Optimized energy =  $-2023.89134677$  a. u.

Imaginary frequency =  $(44.9 \text{ cm}^{-1})i$

| Center Number | Atomic Number | Coordinates (Å) |           |           |
|---------------|---------------|-----------------|-----------|-----------|
|               |               | X               | Y         | Z         |
| 1             | 40            | -0.000134       | 0.000052  | 0.000163  |
| 2             | 6             | -2.697796       | 1.377122  | -1.704333 |
| 3             | 6             | -4.074991       | 1.102279  | -2.032714 |
| 4             | 1             | -4.800448       | 1.851793  | -2.323644 |
| 5             | 6             | -4.230484       | -0.246962 | -1.958412 |
| 6             | 1             | -5.109435       | -0.839910 | -2.178588 |
| 7             | 6             | -2.943740       | -0.789011 | -1.596343 |
| 8             | 6             | -2.665984       | -2.149367 | -1.611422 |
| 9             | 1             | -3.499956       | -2.821838 | -1.790025 |
| 10            | 6             | -1.395632       | -2.709513 | -1.593785 |
| 11            | 6             | -1.138738       | -4.082476 | -1.953799 |
| 12            | 1             | -1.904506       | -4.815861 | -2.173679 |
| 13            | 6             | 0.212843        | -4.216912 | -2.027397 |
| 14            | 1             | 0.791270        | -5.085365 | -2.317030 |
| 15            | 6             | 0.773745        | -2.929166 | -1.700600 |
| 16            | 6             | 2.128694        | -2.646372 | -1.795704 |
| 17            | 1             | 2.790028        | -3.468147 | -2.054079 |
| 18            | 6             | 2.693859        | -1.382741 | -1.704233 |
| 19            | 6             | 4.070757        | -1.108724 | -2.034706 |
| 20            | 1             | 4.795806        | -1.858993 | -2.324672 |
| 21            | 6             | 4.226591        | 0.240702  | -1.964124 |
| 22            | 1             | 5.105474        | 0.832750  | -2.186952 |
| 23            | 6             | 2.940363        | 0.783754  | -1.601626 |
| 24            | 6             | 2.661881        | 2.143874  | -1.619538 |
| 25            | 1             | 3.495071        | 2.816888  | -1.799697 |
| 26            | 6             | 1.391145        | 2.703342  | -1.600970 |
| 27            | 6             | 1.134001        | 4.076193  | -1.960846 |
| 28            | 1             | 1.899715        | 4.809419  | -2.181460 |
| 29            | 6             | -0.217601       | 4.210843  | -2.032786 |
| 30            | 1             | -0.796358       | 5.079212  | -2.322031 |
| 31            | 6             | -0.778281       | 2.923279  | -1.704933 |
| 32            | 6             | -2.133260       | 2.640728  | -1.798103 |
| 33            | 1             | -2.795127       | 3.462108  | -2.056207 |

|    |   |           |           |           |
|----|---|-----------|-----------|-----------|
| 34 | 7 | -2.021450 | 0.215716  | -1.399626 |
| 35 | 7 | -0.218148 | -2.021202 | -1.397361 |
| 36 | 7 | 2.018408  | -0.220345 | -1.401039 |
| 37 | 7 | 0.213822  | 2.014971  | -1.403011 |
| 38 | 6 | 2.708597  | -1.392573 | 1.596853  |
| 39 | 6 | 4.082007  | -1.136758 | 1.955856  |
| 40 | 1 | 4.814640  | -1.903023 | 2.176588  |
| 41 | 6 | 4.217843  | 0.214768  | 2.027044  |
| 42 | 1 | 5.086888  | 0.793001  | 2.315261  |
| 43 | 6 | 2.930371  | 0.776377  | 1.699949  |
| 44 | 6 | 2.648266  | 2.131488  | 1.792596  |
| 45 | 1 | 3.470253  | 2.793020  | 2.049814  |
| 46 | 6 | 1.384668  | 2.696427  | 1.700478  |
| 47 | 6 | 1.111183  | 4.073636  | 2.029773  |
| 48 | 1 | 1.861642  | 4.798605  | 2.319391  |
| 49 | 6 | -0.238093 | 4.229958  | 1.958570  |
| 50 | 1 | -0.829852 | 5.109348  | 2.180163  |
| 51 | 6 | -0.781896 | 2.943576  | 1.597694  |
| 52 | 6 | -2.142568 | 2.667482  | 1.615677  |
| 53 | 1 | -2.813569 | 3.502434  | 1.795117  |
| 54 | 6 | -2.704558 | 1.397958  | 1.598155  |
| 55 | 6 | -4.077589 | 1.142660  | 1.958985  |
| 56 | 1 | -4.809852 | 1.909280  | 2.179655  |
| 57 | 6 | -4.213800 | -0.208797 | 2.031556  |
| 58 | 1 | -5.082657 | -0.786328 | 2.321755  |
| 59 | 6 | -2.926784 | -0.771025 | 1.703805  |
| 60 | 6 | -2.644128 | -2.125766 | 1.799925  |
| 61 | 1 | -3.465711 | -2.787323 | 2.058311  |
| 62 | 6 | -1.380103 | -2.690263 | 1.708837  |
| 63 | 6 | -1.106048 | -4.067235 | 2.038340  |
| 64 | 1 | -1.856114 | -4.791983 | 2.329550  |
| 65 | 6 | 0.243056  | -4.223725 | 1.963907  |
| 66 | 1 | 0.835352  | -5.103007 | 2.184524  |
| 67 | 6 | 0.786127  | -2.937604 | 1.601518  |
| 68 | 6 | 2.146873  | -2.662027 | 1.615620  |
| 69 | 1 | 2.818258  | -3.496984 | 1.793434  |
| 70 | 7 | 2.021389  | -0.214957 | 1.398975  |
| 71 | 7 | 0.221955  | 2.020723  | 1.398124  |
| 72 | 7 | -2.018074 | 0.219767  | 1.400134  |
| 73 | 7 | -0.217932 | -2.014350 | 1.404575  |

---

C. (Por)Zr( $\kappa^4$ -XbicH<sub>2</sub>)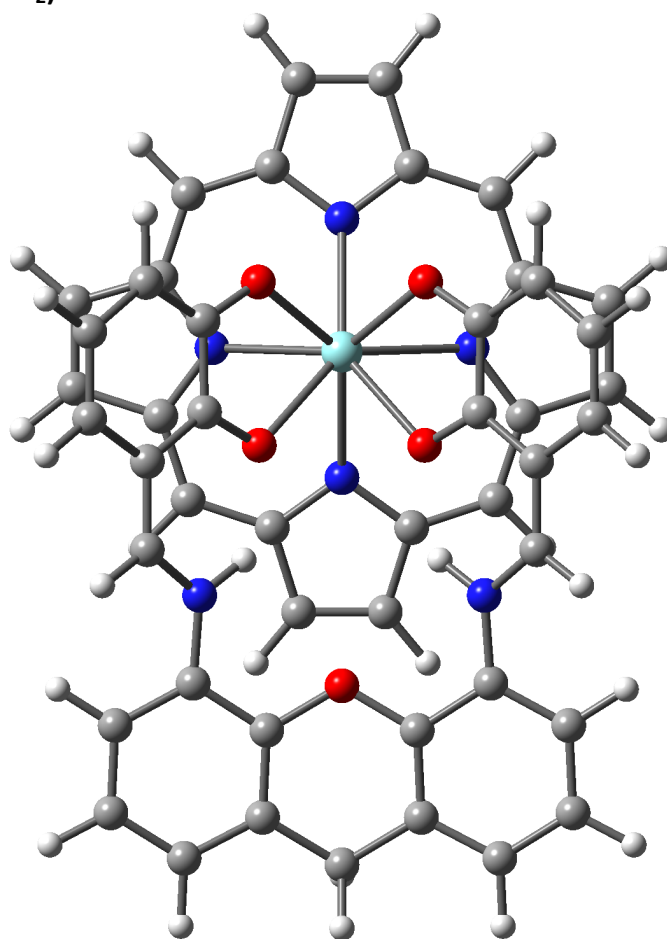

Optimized energy = -2560.99630303 a. u.

| Center Number | Atomic Number | Coordinates (Å) |           |           |
|---------------|---------------|-----------------|-----------|-----------|
|               |               | X               | Y         | Z         |
| 1             | 40            | -1.800741       | 0.000026  | -0.206762 |
| 2             | 8             | -2.600037       | 1.319834  | 1.323839  |
| 3             | 8             | -0.105081       | 1.304215  | 0.676223  |
| 4             | 8             | -2.599934       | -1.319424 | 1.324234  |
| 5             | 8             | -0.105076       | -1.304038 | 0.676320  |
| 6             | 8             | 3.649653        | 0.000033  | 0.099994  |
| 7             | 7             | 2.368446        | 2.244457  | 0.930868  |
| 8             | 1             | 1.717150        | 1.545797  | 0.546568  |
| 9             | 7             | 2.368326        | -2.244416 | 0.930655  |
| 10            | 1             | 1.716931        | -1.545757 | 0.546421  |
| 11            | 7             | -4.062548       | -0.000043 | -0.758933 |
| 12            | 7             | -2.113383       | -2.050818 | -1.377987 |
| 13            | 7             | -0.128716       | -0.000127 | -1.885188 |
| 14            | 7             | -2.113377       | 2.050646  | -1.378413 |
| 15            | 6             | -1.845118       | 2.190352  | 1.944868  |
| 16            | 6             | -0.450665       | 2.167797  | 1.574163  |
| 17            | 6             | 0.480588        | 3.068499  | 2.203196  |
| 18            | 6             | -0.000522       | 3.979852  | 3.208303  |
| 19            | 1             | 0.701480        | 4.660975  | 3.682187  |



|    |   |           |           |           |
|----|---|-----------|-----------|-----------|
| 20 | 6 | -1.328586 | 3.978032  | 3.542323  |
| 21 | 1 | -1.695728 | 4.666406  | 4.298931  |
| 22 | 6 | -2.254495 | 3.090473  | 2.920936  |
| 23 | 1 | -3.301348 | 3.102418  | 3.210502  |
| 24 | 6 | 1.823293  | 3.070557  | 1.831785  |
| 25 | 1 | 2.502584  | 3.778293  | 2.301743  |
| 26 | 6 | -1.845023 | -2.189994 | 1.945204  |
| 27 | 6 | -0.450616 | -2.167569 | 1.574336  |
| 28 | 6 | 0.480639  | -3.068320 | 2.203281  |
| 29 | 6 | -0.000414 | -3.979595 | 3.208481  |
| 30 | 1 | 0.701591  | -4.660761 | 3.682302  |
| 31 | 6 | -1.328439 | -3.977651 | 3.542666  |
| 32 | 1 | -1.695540 | -4.665959 | 4.299354  |
| 33 | 6 | -2.254353 | -3.090044 | 2.921359  |
| 34 | 1 | -3.301174 | -3.101899 | 3.211051  |
| 35 | 6 | 1.823297  | -3.070468 | 1.831678  |
| 36 | 1 | 2.502635  | -3.778228 | 2.301557  |
| 37 | 6 | 3.679268  | 2.346774  | 0.431401  |
| 38 | 6 | 4.341601  | 1.186827  | -0.017862 |
| 39 | 6 | 5.635572  | 1.252184  | -0.537809 |
| 40 | 6 | 6.287609  | 2.489329  | -0.571501 |
| 41 | 1 | 7.299064  | 2.540758  | -0.966128 |
| 42 | 6 | 5.649080  | 3.644631  | -0.127712 |
| 43 | 1 | 6.154836  | 4.603856  | -0.178813 |
| 44 | 6 | 4.343333  | 3.576542  | 0.353969  |
| 45 | 1 | 3.822874  | 4.482437  | 0.646837  |
| 46 | 6 | 3.679069  | -2.346768 | 0.430990  |
| 47 | 6 | 4.342992  | -3.576593 | 0.353278  |
| 48 | 1 | 3.822447  | -4.482480 | 0.646036  |
| 49 | 6 | 5.648691  | -3.644735 | -0.128528 |
| 50 | 1 | 6.154342  | -4.604003 | -0.179852 |
| 51 | 6 | 6.287317  | -2.489410 | -0.572117 |
| 52 | 1 | 7.298749  | -2.540864 | -0.966798 |
| 53 | 6 | 5.635422  | -1.252197 | -0.538129 |
| 54 | 6 | 4.341477  | -1.186807 | -0.018120 |
| 55 | 6 | -4.885694 | 1.098631  | -0.684434 |
| 56 | 6 | -6.256417 | 0.681144  | -0.502428 |
| 57 | 1 | -7.101980 | 1.353248  | -0.424413 |
| 58 | 6 | -6.256414 | -0.681172 | -0.502248 |
| 59 | 1 | -7.101973 | -1.353260 | -0.424059 |
| 60 | 6 | -4.885690 | -1.098696 | -0.684151 |
| 61 | 6 | -3.219256 | -2.854161 | -1.245669 |
| 62 | 6 | -2.901614 | -4.210199 | -1.631084 |
| 63 | 1 | -3.603500 | -5.034994 | -1.629595 |
| 64 | 6 | -1.595155 | -4.212488 | -2.018924 |
| 65 | 1 | -1.009292 | -5.039082 | -2.401998 |
| 66 | 6 | -1.115793 | -2.856610 | -1.870662 |
| 67 | 6 | 0.586731  | -1.099449 | -2.306398 |
| 68 | 6 | 1.813822  | -0.682576 | -2.941119 |
| 69 | 1 | 2.544400  | -1.354925 | -3.374421 |
| 70 | 6 | 1.813820  | 0.682110  | -2.941260 |
| 71 | 1 | 2.544390  | 1.354371  | -3.374712 |
| 72 | 6 | 0.586730  | 1.099113  | -2.306620 |
| 73 | 6 | -1.115788 | 2.856352  | -1.871226 |
| 74 | 6 | -1.595164 | 4.212196  | -2.019771 |
| 75 | 1 | -1.009297 | 5.038723  | -2.402980 |
| 76 | 6 | -2.901634 | 4.209963  | -1.631976 |
| 77 | 1 | -3.603537 | 5.034746  | -1.630685 |

|    |   |           |           |           |
|----|---|-----------|-----------|-----------|
| 78 | 6 | -3.219267 | 2.853998  | -1.246300 |
| 79 | 6 | 6.285297  | 0.000022  | -1.078047 |
| 80 | 1 | 7.357178  | -0.000070 | -0.844889 |
| 81 | 1 | 6.217062  | 0.000170  | -2.177597 |
| 82 | 6 | -4.489418 | -2.420522 | -0.869905 |
| 83 | 1 | -5.265235 | -3.177920 | -0.799777 |
| 84 | 6 | 0.152297  | -2.423424 | -2.250607 |
| 85 | 1 | 0.833347  | -3.177391 | -2.636619 |
| 86 | 6 | 0.152302  | 2.423100  | -2.251087 |
| 87 | 1 | 0.833352  | 3.176992  | -2.637240 |
| 88 | 6 | -4.489432 | 2.420416  | -0.870486 |
| 89 | 1 | -5.265264 | 3.177818  | -0.800552 |

---

D. (Por)Zr( $\kappa^3$ -XbicH<sub>2</sub>), NH tautomer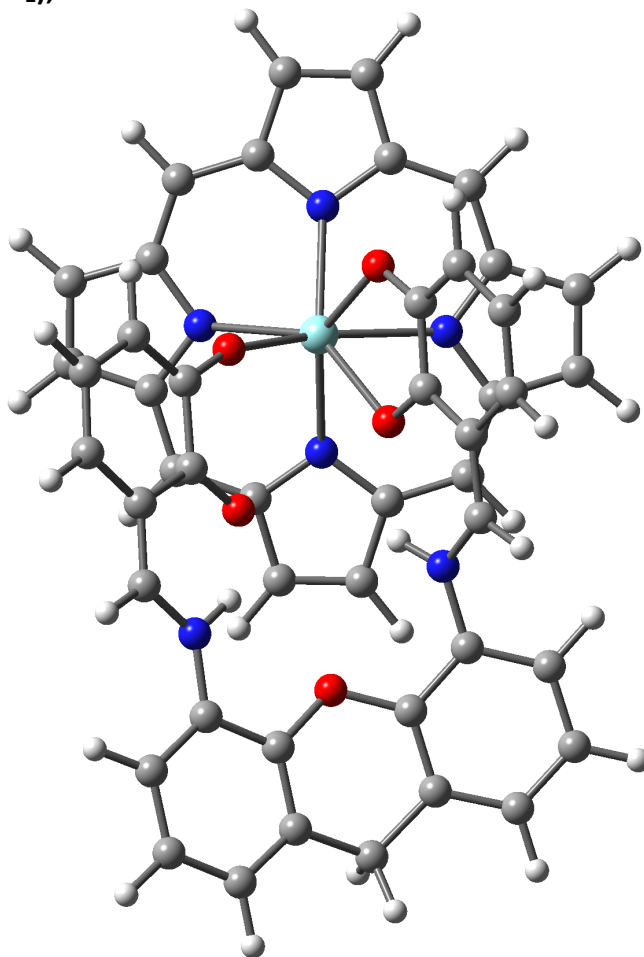

Optimized energy = -2560.98568823 a.u.

| Center Number | Atomic Number | Coordinates (Å) |           |           |
|---------------|---------------|-----------------|-----------|-----------|
|               |               | X               | Y         | Z         |
| 1             | 40            | 2.230917        | 0.065502  | -0.245471 |
| 2             | 8             | -4.071566       | -0.119952 | -0.285543 |
| 3             | 6             | -6.580209       | -0.907923 | -1.388660 |
| 4             | 1             | -7.599587       | -1.279775 | -1.232142 |
| 5             | 1             | -6.464139       | -0.788052 | -2.477844 |
| 6             | 8             | 2.750946        | -0.728445 | 1.670026  |
| 7             | 8             | 0.402134        | -1.005720 | 0.595379  |
| 8             | 7             | -2.192207       | -1.892839 | 0.733634  |
| 9             | 1             | -1.586333       | -1.201965 | 0.276508  |
| 10            | 6             | 1.845744        | -1.356972 | 2.396781  |
| 11            | 6             | 0.548069        | -1.498430 | 1.777468  |
| 12            | 6             | -0.501316       | -2.193251 | 2.475900  |
| 13            | 6             | -0.235552       | -2.725518 | 3.787602  |
| 14            | 1             | -1.029787       | -3.251303 | 4.311372  |
| 15            | 6             | 0.997926        | -2.557565 | 4.355242  |
| 16            | 1             | 1.197244        | -2.953027 | 5.347417  |
| 17            | 6             | 2.042818        | -1.872907 | 3.666743  |
| 18            | 1             | 3.017088        | -1.752402 | 4.132100  |

|    |   |           |           |           |
|----|---|-----------|-----------|-----------|
| 19 | 6 | -1.749174 | -2.401140 | 1.889194  |
| 20 | 1 | -2.464854 | -3.036849 | 2.407450  |
| 21 | 6 | -3.389565 | -2.356467 | 0.127762  |
| 22 | 6 | -3.650307 | -3.730138 | 0.061060  |
| 23 | 1 | -2.888193 | -4.424083 | 0.402201  |
| 24 | 6 | -4.861119 | -4.199114 | -0.446583 |
| 25 | 1 | -5.051523 | -5.267026 | -0.489546 |
| 26 | 6 | -5.816619 | -3.295414 | -0.906988 |
| 27 | 1 | -6.763877 | -3.655802 | -1.300147 |
| 28 | 6 | -5.572789 | -1.918891 | -0.881461 |
| 29 | 6 | -4.356391 | -1.460068 | -0.365283 |
| 30 | 8 | 1.518486  | 1.672529  | 0.777934  |
| 31 | 8 | -1.147990 | 1.469683  | 0.292174  |
| 32 | 7 | -3.533125 | 2.251058  | 0.713172  |
| 33 | 1 | -2.778517 | 1.633169  | 0.337754  |
| 34 | 6 | 0.683825  | 2.472516  | 1.416215  |
| 35 | 6 | -0.745961 | 2.343163  | 1.113664  |
| 36 | 6 | -1.662254 | 3.266410  | 1.796442  |
| 37 | 6 | -1.155690 | 4.236735  | 2.727257  |
| 38 | 1 | -1.856533 | 4.905376  | 3.222450  |
| 39 | 6 | 0.184350  | 4.301813  | 2.981089  |
| 40 | 1 | 0.573806  | 5.029557  | 3.687689  |
| 41 | 6 | 1.100696  | 3.421615  | 2.326968  |
| 42 | 1 | 2.163970  | 3.492195  | 2.539622  |
| 43 | 6 | -3.028640 | 3.176864  | 1.540935  |
| 44 | 1 | -3.725599 | 3.853358  | 2.032721  |
| 45 | 6 | -4.851398 | 2.026070  | 0.328194  |
| 46 | 6 | -5.893639 | 2.954065  | 0.439138  |
| 47 | 1 | -5.698222 | 3.939560  | 0.849857  |
| 48 | 6 | -7.175273 | 2.617828  | 0.000904  |
| 49 | 1 | -7.977927 | 3.343358  | 0.093874  |
| 50 | 6 | -7.427261 | 1.372822  | -0.575751 |
| 51 | 1 | -8.423754 | 1.126612  | -0.932761 |
| 52 | 6 | -6.397288 | 0.434469  | -0.715134 |
| 53 | 6 | -5.133402 | 0.767377  | -0.239899 |
| 54 | 6 | 0.531957  | -2.606476 | -2.121445 |
| 55 | 1 | -0.112328 | -3.400271 | -2.489986 |
| 56 | 6 | 5.067544  | 2.358736  | -0.667543 |
| 57 | 1 | 5.831595  | 3.120474  | -0.541870 |
| 58 | 7 | 2.837918  | 1.904344  | -1.589002 |
| 59 | 7 | 0.853220  | -0.163580 | -2.084463 |
| 60 | 6 | 3.904867  | 2.731666  | -1.340908 |
| 61 | 6 | 3.665903  | 4.038748  | -1.909837 |
| 62 | 1 | 4.360532  | 4.868564  | -1.869891 |
| 63 | 6 | 2.440891  | 3.989725  | -2.503851 |
| 64 | 1 | 1.928070  | 4.771230  | -3.050682 |
| 65 | 6 | 1.930049  | 2.652905  | -2.298267 |
| 66 | 6 | 0.710130  | 2.191182  | -2.789799 |
| 67 | 1 | 0.102334  | 2.906308  | -3.336840 |
| 68 | 6 | 0.232316  | 0.882991  | -2.728924 |
| 69 | 6 | -0.921938 | 0.402929  | -3.447443 |
| 70 | 1 | -1.578750 | 1.022426  | -4.045324 |
| 71 | 6 | -0.966922 | -0.948979 | -3.267821 |
| 72 | 1 | -1.666531 | -1.658342 | -3.692789 |
| 73 | 6 | 0.156152  | -1.299720 | -2.432639 |
| 74 | 7 | 4.532638  | -0.012171 | -0.292449 |
| 75 | 7 | 2.633750  | -2.133203 | -0.945426 |
| 76 | 6 | 5.373782  | 1.076423  | -0.216130 |

|    |   |          |           |           |
|----|---|----------|-----------|-----------|
| 77 | 6 | 6.658604 | 0.670388  | 0.299510  |
| 78 | 1 | 7.502119 | 1.332779  | 0.448647  |
| 79 | 6 | 6.597379 | -0.677681 | 0.496276  |
| 80 | 1 | 7.382015 | -1.340471 | 0.839455  |
| 81 | 6 | 5.273660 | -1.101413 | 0.109479  |
| 82 | 6 | 4.859847 | -2.431590 | 0.055258  |
| 83 | 1 | 5.577254 | -3.175473 | 0.390688  |
| 84 | 6 | 3.663644 | -2.913024 | -0.477064 |
| 85 | 6 | 3.360247 | -4.309934 | -0.688539 |
| 86 | 1 | 4.011733 | -5.132887 | -0.421843 |
| 87 | 6 | 2.145447 | -4.361168 | -1.306914 |
| 88 | 1 | 1.604157 | -5.234896 | -1.648584 |
| 89 | 6 | 1.702926 | -2.995731 | -1.471988 |

---

E. (Por)Zr( $\kappa^3$ -XbicH<sub>2</sub>), OH tautomer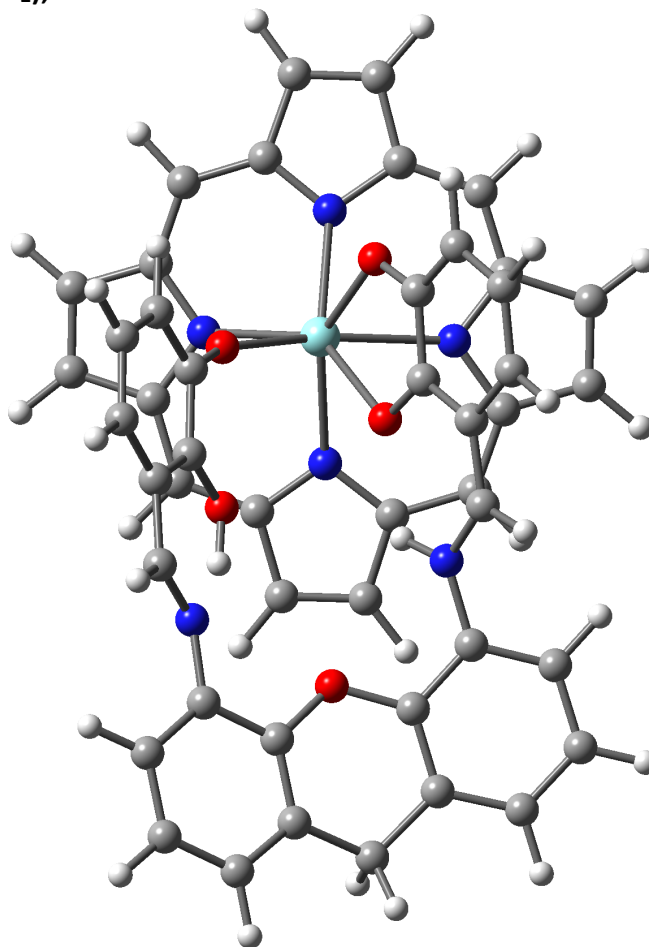

Optimized energy = -2560.98981605 a. u.

| Center Number | Atomic Number | Coordinates (Å) |           |           |
|---------------|---------------|-----------------|-----------|-----------|
|               |               | X               | Y         | Z         |
| 1             | 40            | 2.253002        | 0.104992  | -0.276187 |
| 2             | 8             | -4.104636       | -0.053580 | -0.330134 |
| 3             | 6             | -6.647656       | -0.787640 | -1.406473 |
| 4             | 1             | -7.665190       | -1.154444 | -1.226091 |
| 5             | 1             | -6.566676       | -0.642515 | -2.495854 |
| 6             | 8             | 2.676766        | -0.621219 | 1.682584  |
| 7             | 8             | 0.347443        | -0.871841 | 0.553071  |
| 8             | 7             | -2.232240       | -1.852484 | 0.604646  |
| 9             | 1             | -1.615327       | -1.170792 | 0.150602  |
| 10            | 6             | 1.752873        | -1.258021 | 2.380076  |
| 11            | 6             | 0.471221        | -1.392872 | 1.729396  |
| 12            | 6             | -0.582345       | -2.115017 | 2.391055  |
| 13            | 6             | -0.344700       | -2.659230 | 3.702742  |
| 14            | 1             | -1.146053       | -3.201823 | 4.197714  |
| 15            | 6             | 0.871617        | -2.486566 | 4.305251  |
| 16            | 1             | 1.049752        | -2.891963 | 5.297343  |
| 17            | 6             | 1.925333        | -1.787084 | 3.648407  |
| 18            | 1             | 2.889132        | -1.665913 | 4.134953  |

|    |   |           |           |           |
|----|---|-----------|-----------|-----------|
| 19 | 6 | -1.812805 | -2.344235 | 1.772960  |
| 20 | 1 | -2.532181 | -2.987171 | 2.276763  |
| 21 | 6 | -3.436831 | -2.300386 | -0.005527 |
| 22 | 6 | -3.700422 | -3.669945 | -0.109795 |
| 23 | 1 | -2.936647 | -4.376035 | 0.202033  |
| 24 | 6 | -4.921486 | -4.117668 | -0.613380 |
| 25 | 1 | -5.117955 | -5.182732 | -0.687833 |
| 26 | 6 | -5.881576 | -3.194919 | -1.025267 |
| 27 | 1 | -6.837563 | -3.539856 | -1.411444 |
| 28 | 6 | -5.634596 | -1.820326 | -0.958041 |
| 29 | 6 | -4.406041 | -1.382112 | -0.451551 |
| 30 | 8 | 1.517879  | 1.775655  | 0.642233  |
| 31 | 8 | -1.088043 | 1.747543  | 0.003569  |
| 32 | 1 | -2.088747 | 1.797782  | -0.039538 |
| 33 | 7 | -3.507117 | 2.299904  | 0.666200  |
| 34 | 6 | 0.658864  | 2.361442  | 1.466788  |
| 35 | 6 | -0.724987 | 2.366813  | 1.137424  |
| 36 | 6 | -1.660847 | 2.999303  | 2.001009  |
| 37 | 6 | -1.203088 | 3.643040  | 3.176601  |
| 38 | 1 | -1.927696 | 4.119838  | 3.832445  |
| 39 | 6 | 0.145223  | 3.651827  | 3.482349  |
| 40 | 1 | 0.500388  | 4.145405  | 4.382509  |
| 41 | 6 | 1.067237  | 3.012076  | 2.634397  |
| 42 | 1 | 2.127274  | 3.005980  | 2.871201  |
| 43 | 6 | -3.075664 | 2.911014  | 1.722452  |
| 44 | 1 | -3.768215 | 3.332582  | 2.464402  |
| 45 | 6 | -4.844663 | 2.091458  | 0.344947  |
| 46 | 6 | -5.878344 | 3.025728  | 0.490431  |
| 47 | 1 | -5.652995 | 4.000210  | 0.913966  |
| 48 | 6 | -7.171501 | 2.718348  | 0.061605  |
| 49 | 1 | -7.964831 | 3.451312  | 0.176617  |
| 50 | 6 | -7.444632 | 1.486474  | -0.532336 |
| 51 | 1 | -8.449245 | 1.258457  | -0.879729 |
| 52 | 6 | -6.429572 | 0.536449  | -0.705604 |
| 53 | 6 | -5.152793 | 0.848875  | -0.248999 |
| 54 | 6 | 0.506589  | -2.555239 | -2.118671 |
| 55 | 1 | -0.156311 | -3.334235 | -2.485775 |
| 56 | 6 | 5.190630  | 2.275660  | -0.649709 |
| 57 | 1 | 5.978009  | 3.011567  | -0.515028 |
| 58 | 7 | 2.978383  | 1.878614  | -1.636039 |
| 59 | 7 | 0.928715  | -0.127637 | -2.147626 |
| 60 | 6 | 4.064988  | 2.674292  | -1.369319 |
| 61 | 6 | 3.892065  | 3.974569  | -1.975700 |
| 62 | 1 | 4.613461  | 4.780840  | -1.929406 |
| 63 | 6 | 2.688453  | 3.952742  | -2.613580 |
| 64 | 1 | 2.223584  | 4.737676  | -3.197075 |
| 65 | 6 | 2.123813  | 2.639979  | -2.396716 |
| 66 | 6 | 0.908952  | 2.208785  | -2.925936 |
| 67 | 1 | 0.350224  | 2.930554  | -3.514814 |
| 68 | 6 | 0.378357  | 0.921883  | -2.849272 |
| 69 | 6 | -0.766466 | 0.465671  | -3.597481 |
| 70 | 1 | -1.373525 | 1.091078  | -4.240059 |
| 71 | 6 | -0.876314 | -0.876626 | -3.376323 |
| 72 | 1 | -1.589492 | -1.569675 | -3.805535 |
| 73 | 6 | 0.197839  | -1.245632 | -2.486855 |
| 74 | 7 | 4.550829  | -0.062360 | -0.237597 |
| 75 | 7 | 2.583460  | -2.128101 | -0.881400 |
| 76 | 6 | 5.432028  | 0.993637  | -0.159603 |

|    |   |          |           |           |
|----|---|----------|-----------|-----------|
| 77 | 6 | 6.680941 | 0.551770  | 0.411890  |
| 78 | 1 | 7.544972 | 1.184186  | 0.573094  |
| 79 | 6 | 6.557822 | -0.786381 | 0.643663  |
| 80 | 1 | 7.302237 | -1.469610 | 1.033212  |
| 81 | 6 | 5.231528 | -1.167935 | 0.222840  |
| 82 | 6 | 4.763954 | -2.481077 | 0.198899  |
| 83 | 1 | 5.439212 | -3.241522 | 0.581375  |
| 84 | 6 | 3.565463 | -2.932480 | -0.354602 |
| 85 | 6 | 3.212272 | -4.322019 | -0.532694 |
| 86 | 1 | 3.820670 | -5.161192 | -0.219014 |
| 87 | 6 | 2.017424 | -4.345084 | -1.190786 |
| 88 | 1 | 1.453336 | -5.207467 | -1.524265 |
| 89 | 6 | 1.636319 | -2.969712 | -1.413820 |

---



F. (Por)Zr( $\kappa^3$ -XbicH<sub>2</sub>), tautomerization transition state

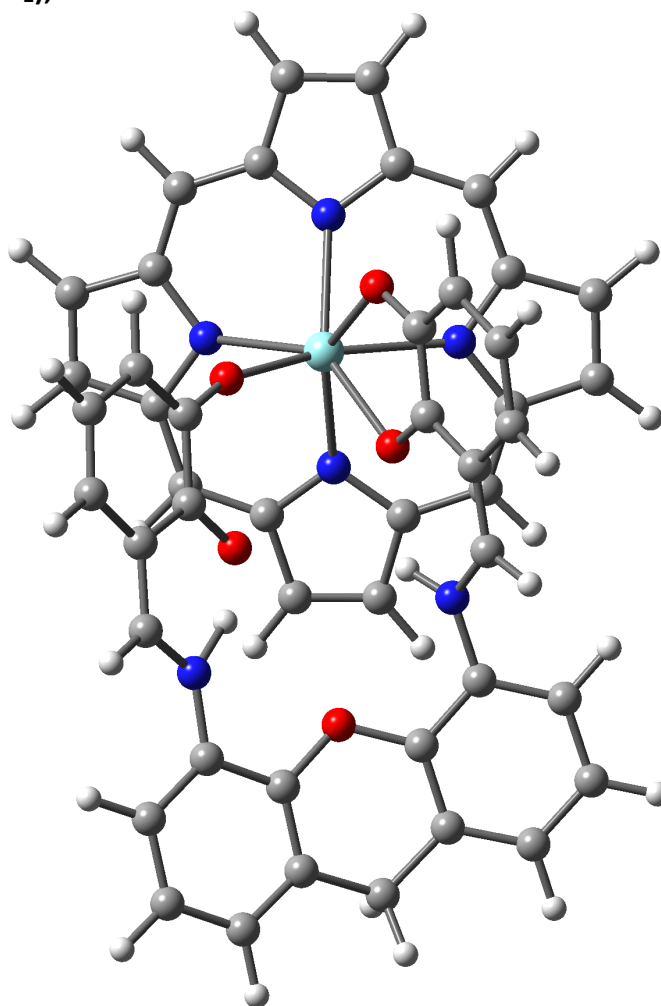

Optimized energy = -2560.98241511 a.u.

Imaginary frequency = (1167.7 cm<sup>-1</sup>)i

| Center Number | Atomic Number | Coordinates (Å) |           |           |
|---------------|---------------|-----------------|-----------|-----------|
|               |               | X               | Y         | Z         |
| 1             | 40            | 2.216084        | 0.085900  | -0.270918 |
| 2             | 8             | -4.018830       | -0.118044 | -0.278827 |
| 3             | 6             | -6.512739       | -0.872439 | -1.442285 |
| 4             | 1             | -7.540987       | -1.228369 | -1.307865 |
| 5             | 1             | -6.371153       | -0.755882 | -2.528878 |
| 6             | 8             | 2.741718        | -0.668870 | 1.657380  |
| 7             | 8             | 0.386005        | -0.964203 | 0.601571  |
| 8             | 7             | -2.176867       | -1.902085 | 0.743415  |
| 9             | 1             | -1.576088       | -1.203376 | 0.291013  |
| 10            | 6             | 1.848380        | -1.309018 | 2.389721  |
| 11            | 6             | 0.548382        | -1.463759 | 1.780277  |
| 12            | 6             | -0.484133       | -2.179416 | 2.481690  |
| 13            | 6             | -0.202978       | -2.711359 | 3.789639  |
| 14            | 1             | -0.985703       | -3.251744 | 4.315855  |
| 15            | 6             | 1.031318        | -2.526236 | 4.350798  |
| 16            | 1             | 1.242668        | -2.921474 | 5.340541  |

|    |   |           |           |           |
|----|---|-----------|-----------|-----------|
| 17 | 6 | 2.061375  | -1.825257 | 3.657169  |
| 18 | 1 | 3.037386  | -1.692898 | 4.115642  |
| 19 | 6 | -1.730414 | -2.407550 | 1.897132  |
| 20 | 1 | -2.436280 | -3.055591 | 2.413573  |
| 21 | 6 | -3.372260 | -2.360668 | 0.132126  |
| 22 | 6 | -3.645978 | -3.731190 | 0.062771  |
| 23 | 1 | -2.896929 | -4.434027 | 0.414617  |
| 24 | 6 | -4.854359 | -4.185583 | -0.464186 |
| 25 | 1 | -5.056992 | -5.251126 | -0.510087 |
| 26 | 6 | -5.790530 | -3.270742 | -0.942687 |
| 27 | 1 | -6.734146 | -3.620651 | -1.353752 |
| 28 | 6 | -5.531695 | -1.896981 | -0.912941 |
| 29 | 6 | -4.320737 | -1.451934 | -0.373124 |
| 30 | 8 | 1.464093  | 1.702030  | 0.706915  |
| 31 | 8 | -1.233228 | 1.563508  | 0.243815  |
| 32 | 7 | -3.477605 | 2.255957  | 0.745780  |
| 33 | 1 | -2.486911 | 1.727488  | 0.309667  |
| 34 | 6 | 0.633958  | 2.413176  | 1.453548  |
| 35 | 6 | -0.782133 | 2.345197  | 1.176950  |
| 36 | 6 | -1.673899 | 3.170371  | 1.961302  |
| 37 | 6 | -1.164855 | 4.015095  | 2.991118  |
| 38 | 1 | -1.858244 | 4.621181  | 3.569904  |
| 39 | 6 | 0.185500  | 4.046499  | 3.236261  |
| 40 | 1 | 0.588141  | 4.682695  | 4.019365  |
| 41 | 6 | 1.075901  | 3.250326  | 2.469297  |
| 42 | 1 | 2.144190  | 3.286036  | 2.664463  |
| 43 | 6 | -3.057975 | 3.081280  | 1.686536  |
| 44 | 1 | -3.774856 | 3.669567  | 2.264398  |
| 45 | 6 | -4.786628 | 2.037980  | 0.325127  |
| 46 | 6 | -5.822687 | 2.978206  | 0.402899  |
| 47 | 1 | -5.620612 | 3.961752  | 0.816163  |
| 48 | 6 | -7.095597 | 2.662249  | -0.072649 |
| 49 | 1 | -7.891237 | 3.398474  | -0.006305 |
| 50 | 6 | -7.344740 | 1.418818  | -0.654026 |
| 51 | 1 | -8.333542 | 1.183908  | -1.039526 |
| 52 | 6 | -6.323796 | 0.467461  | -0.764891 |
| 53 | 6 | -5.066621 | 0.784873  | -0.257360 |
| 54 | 6 | 0.493685  | -2.600093 | -2.100846 |
| 55 | 1 | -0.156255 | -3.395244 | -2.456268 |
| 56 | 6 | 5.065180  | 2.360440  | -0.727806 |
| 57 | 1 | 5.833337  | 3.119844  | -0.613782 |
| 58 | 7 | 2.829035  | 1.905691  | -1.632559 |
| 59 | 7 | 0.828983  | -0.159261 | -2.096924 |
| 60 | 6 | 3.900136  | 2.731678  | -1.397977 |
| 61 | 6 | 3.661852  | 4.034371  | -1.976902 |
| 62 | 1 | 4.359170  | 4.862387  | -1.948151 |
| 63 | 6 | 2.433396  | 3.983737  | -2.563816 |
| 64 | 1 | 1.920100  | 4.761936  | -3.114897 |
| 65 | 6 | 1.919538  | 2.650527  | -2.343868 |
| 66 | 6 | 0.696009  | 2.188746  | -2.826135 |
| 67 | 1 | 0.088963  | 2.901368  | -3.377209 |
| 68 | 6 | 0.211911  | 0.883536  | -2.750990 |
| 69 | 6 | -0.947182 | 0.401400  | -3.460235 |
| 70 | 1 | -1.603109 | 1.017632  | -4.062393 |
| 71 | 6 | -0.999276 | -0.948106 | -3.264694 |
| 72 | 1 | -1.704827 | -1.658146 | -3.678499 |
| 73 | 6 | 0.124335  | -1.295601 | -2.428943 |
| 74 | 7 | 4.518814  | -0.002740 | -0.323955 |

|    |   |          |           |           |
|----|---|----------|-----------|-----------|
| 75 | 7 | 2.601777 | -2.122659 | -0.936820 |
| 76 | 6 | 5.366988 | 1.081218  | -0.264572 |
| 77 | 6 | 6.651543 | 0.673617  | 0.250672  |
| 78 | 1 | 7.499872 | 1.332434  | 0.387857  |
| 79 | 6 | 6.582409 | -0.671308 | 0.465353  |
| 80 | 1 | 7.364144 | -1.334630 | 0.814091  |
| 81 | 6 | 5.254147 | -1.091376 | 0.089940  |
| 82 | 6 | 4.831167 | -2.419460 | 0.057505  |
| 83 | 1 | 5.545584 | -3.162880 | 0.400279  |
| 84 | 6 | 3.629332 | -2.901702 | -0.461518 |
| 85 | 6 | 3.316983 | -4.299436 | -0.652416 |
| 86 | 1 | 3.964719 | -5.122419 | -0.376870 |
| 87 | 6 | 2.099744 | -4.352272 | -1.266102 |
| 88 | 1 | 1.552616 | -5.227610 | -1.594059 |
| 89 | 6 | 1.664143 | -2.987034 | -1.448796 |

---

G. (Por)Zr( $\kappa^3$ -Xbich<sub>2</sub>), NH tautomer, twist transition state

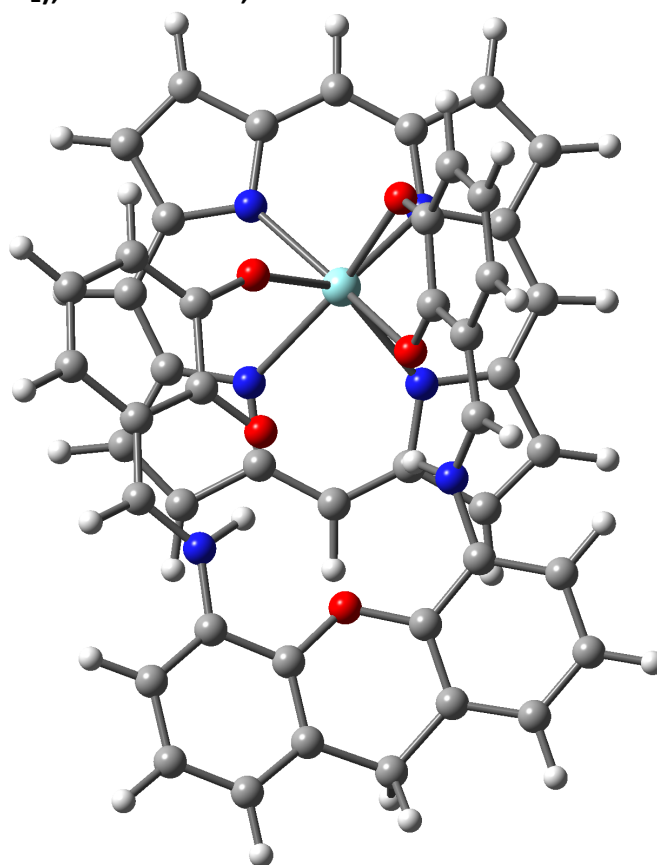

Optimized energy = -2560.97761735 a.u.

Imaginary frequency = (14.0 cm<sup>-1</sup>)i

| Center Number | Atomic Number | Coordinates (Å) |          |           |
|---------------|---------------|-----------------|----------|-----------|
|               |               | X               | Y        | Z         |
| 1             | 40            | 2.196318        | 0.104042 | 0.251184  |
| 2             | 8             | -4.015923       | 0.232986 | 0.251232  |
| 3             | 6             | -6.531993       | 1.083444 | 1.280357  |
| 4             | 1             | -7.569747       | 1.388257 | 1.101709  |
| 5             | 1             | -6.383602       | 1.134617 | 2.371076  |
| 6             | 8             | 2.822118        | 0.978607 | -1.601812 |
| 7             | 8             | 0.432367        | 1.217687 | -0.672129 |
| 8             | 7             | -2.204859       | 1.908701 | -1.021689 |
| 9             | 1             | -1.582396       | 1.313304 | -0.463913 |
| 10            | 6             | 1.912161        | 1.382727 | -2.465320 |
| 11            | 6             | 0.581968        | 1.524128 | -1.916146 |
| 12            | 6             | -0.476474       | 2.038884 | -2.742622 |
| 13            | 6             | -0.191014       | 2.379882 | -4.111397 |
| 14            | 1             | -0.994391       | 2.763372 | -4.735221 |
| 15            | 6             | 1.071993        | 2.205914 | -4.610844 |
| 16            | 1             | 1.284229        | 2.454235 | -5.647068 |
| 17            | 6             | 2.129126        | 1.709761 | -3.793743 |
| 18            | 1             | 3.128295        | 1.591845 | -4.203532 |
| 19            | 6             | -1.753326       | 2.266241 | -2.227766 |
| 20            | 1             | -2.479633       | 2.786780 | -2.849533 |
| 21            | 6             | -3.425219       | 2.408745 | -0.497967 |

|    |   |           |           |           |
|----|---|-----------|-----------|-----------|
| 22 | 6 | -3.743329 | 3.764568  | -0.639349 |
| 23 | 1 | -3.011138 | 4.430166  | -1.085907 |
| 24 | 6 | -4.970412 | 4.255269  | -0.195758 |
| 25 | 1 | -5.205347 | 5.308469  | -0.314342 |
| 26 | 6 | -5.882340 | 3.395933  | 0.414046  |
| 27 | 1 | -6.839249 | 3.774732  | 0.764114  |
| 28 | 6 | -5.580368 | 2.043117  | 0.596790  |
| 29 | 6 | -4.352583 | 1.559331  | 0.133605  |
| 30 | 8 | 1.593564  | -1.417345 | -1.002625 |
| 31 | 8 | -1.077518 | -1.232071 | -0.417678 |
| 32 | 7 | -3.423281 | -2.225399 | -0.475016 |
| 33 | 1 | -2.695893 | -1.500478 | -0.287696 |
| 34 | 6 | 0.768499  | -2.378500 | -1.374225 |
| 35 | 6 | -0.655205 | -2.250878 | -1.037987 |
| 36 | 6 | -1.547700 | -3.344820 | -1.447310 |
| 37 | 6 | -1.031001 | -4.469855 | -2.177306 |
| 38 | 1 | -1.714209 | -5.262813 | -2.473943 |
| 39 | 6 | 0.297072  | -4.524256 | -2.488936 |
| 40 | 1 | 0.694669  | -5.367688 | -3.047179 |
| 41 | 6 | 1.190062  | -3.482755 | -2.089367 |
| 42 | 1 | 2.244247  | -3.547917 | -2.344628 |
| 43 | 6 | -2.900039 | -3.275885 | -1.125111 |
| 44 | 1 | -3.572420 | -4.081782 | -1.413350 |
| 45 | 6 | -4.730881 | -2.001621 | -0.057548 |
| 46 | 6 | -5.738309 | -2.972836 | 0.000581  |
| 47 | 1 | -5.520206 | -3.997308 | -0.283288 |
| 48 | 6 | -7.017818 | -2.625786 | 0.435720  |
| 49 | 1 | -7.792184 | -3.386284 | 0.472676  |
| 50 | 6 | -7.305380 | -1.321279 | 0.837398  |
| 51 | 1 | -8.301523 | -1.062081 | 1.185945  |
| 52 | 6 | -6.310075 | -0.336885 | 0.808829  |
| 53 | 6 | -5.045847 | -0.688964 | 0.348930  |
| 54 | 6 | -0.413276 | 0.158001  | 2.862166  |
| 55 | 1 | -1.336900 | 0.191450  | 3.433089  |
| 56 | 6 | 5.871640  | -0.019915 | 0.023387  |
| 57 | 1 | 6.903786  | -0.047247 | -0.313636 |
| 58 | 7 | 3.930774  | -1.392616 | 0.630350  |
| 59 | 7 | 1.258904  | -1.321757 | 1.854291  |
| 60 | 6 | 5.233925  | -1.243768 | 0.217265  |
| 61 | 6 | 5.868099  | -2.535621 | 0.103037  |
| 62 | 1 | 6.896194  | -2.696387 | -0.196548 |
| 63 | 6 | 4.944140  | -3.462903 | 0.484909  |
| 64 | 1 | 5.064943  | -4.536287 | 0.562764  |
| 65 | 6 | 3.741407  | -2.741548 | 0.829474  |
| 66 | 6 | 2.603672  | -3.330019 | 1.380713  |
| 67 | 1 | 2.624622  | -4.410894 | 1.488779  |
| 68 | 6 | 1.482599  | -2.677947 | 1.895165  |
| 69 | 6 | 0.426713  | -3.330484 | 2.635062  |
| 70 | 1 | 0.371382  | -4.395165 | 2.825259  |
| 71 | 6 | -0.422903 | -2.351753 | 3.057994  |
| 72 | 1 | -1.315615 | -2.453380 | 3.662609  |
| 73 | 6 | 0.112997  | -1.100018 | 2.578461  |
| 74 | 7 | 4.043754  | 1.458620  | 0.734540  |
| 75 | 7 | 1.368201  | 1.538908  | 1.869589  |
| 76 | 6 | 5.326055  | 1.232570  | 0.295701  |
| 77 | 6 | 6.044058  | 2.481492  | 0.191434  |
| 78 | 1 | 7.078694  | 2.576866  | -0.113664 |
| 79 | 6 | 5.180999  | 3.465126  | 0.569996  |

|    |   |           |          |          |
|----|---|-----------|----------|----------|
| 80 | 1 | 5.365540  | 4.529813 | 0.641669 |
| 81 | 6 | 3.935432  | 2.817772 | 0.912570 |
| 82 | 6 | 2.812631  | 3.479770 | 1.406674 |
| 83 | 1 | 2.882221  | 4.560483 | 1.493118 |
| 84 | 6 | 1.644519  | 2.888318 | 1.887786 |
| 85 | 6 | 0.590640  | 3.598788 | 2.569291 |
| 86 | 1 | 0.575467  | 4.668295 | 2.739049 |
| 87 | 6 | -0.310918 | 2.664040 | 2.987581 |
| 88 | 1 | -1.213443 | 2.815802 | 3.566797 |
| 89 | 6 | 0.184265  | 1.379717 | 2.556625 |

---

H. (Por)Zr( $\kappa^3$ -XbicH<sub>2</sub>), OH tautomer, twist transition state

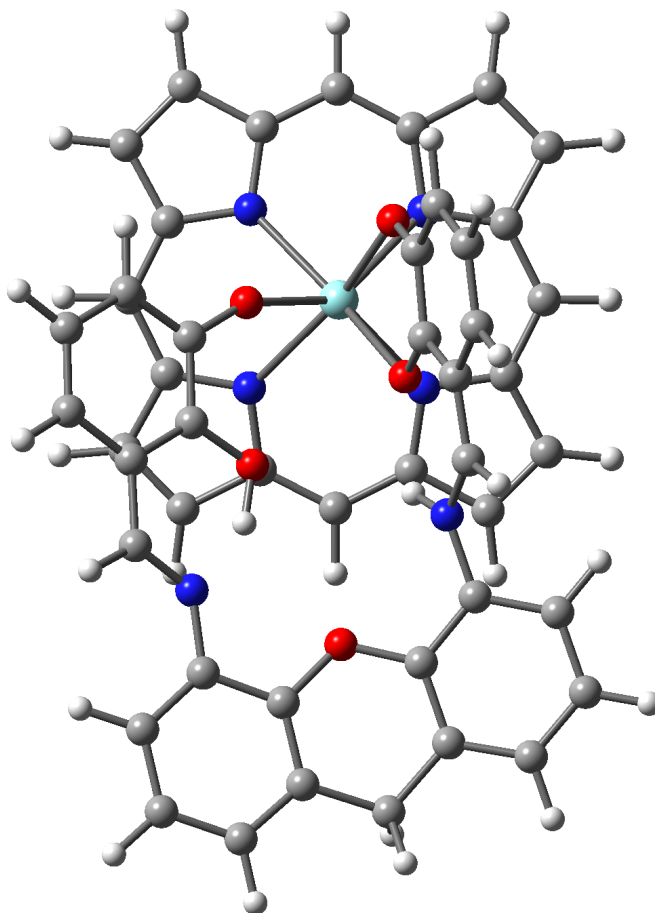

Optimized energy = -2560.98047193 a.u.

Imaginary frequency = (13.7 cm<sup>-1</sup>)i

| Center Number | Atomic Number | Coordinates (Å) |           |           |
|---------------|---------------|-----------------|-----------|-----------|
|               |               | X               | Y         | Z         |
| 1             | 40            | 2.206351        | -0.099088 | -0.264878 |
| 2             | 8             | -4.054808       | -0.234463 | -0.212265 |
| 3             | 6             | -6.602616       | -1.078089 | -1.206208 |
| 4             | 1             | -7.635068       | -1.365620 | -0.973625 |
| 5             | 1             | -6.507880       | -1.154284 | -2.301542 |
| 6             | 8             | 2.802175        | -0.944530 | 1.607434  |
| 7             | 8             | 0.419539        | -1.198054 | 0.651380  |
| 8             | 7             | -2.222307       | -1.924744 | 0.993407  |
| 9             | 1             | -1.583010       | -1.371253 | 0.413116  |
| 10            | 6             | 1.880988        | -1.337598 | 2.464538  |
| 11            | 6             | 0.558414        | -1.491446 | 1.902960  |
| 12            | 6             | -0.503427       | -2.000989 | 2.727113  |
| 13            | 6             | -0.231373       | -2.317948 | 4.103904  |
| 14            | 1             | -1.040003       | -2.695848 | 4.724314  |
| 15            | 6             | 1.025200        | -2.130608 | 4.615246  |
| 16            | 1             | 1.227424        | -2.361423 | 5.657428  |

|    |   |           |           |           |
|----|---|-----------|-----------|-----------|
| 17 | 6 | 2.086609  | -1.643367 | 3.800438  |
| 18 | 1 | 3.081930  | -1.514732 | 4.216361  |
| 19 | 6 | -1.778575 | -2.243021 | 2.210853  |
| 20 | 1 | -2.509279 | -2.742423 | 2.844530  |
| 21 | 6 | -3.457263 | -2.418046 | 0.489055  |
| 22 | 6 | -3.770237 | -3.774492 | 0.625665  |
| 23 | 1 | -3.028123 | -4.442197 | 1.052629  |
| 24 | 6 | -5.006662 | -4.261511 | 0.204148  |
| 25 | 1 | -5.240333 | -5.315538 | 0.317452  |
| 26 | 6 | -5.929969 | -3.394005 | -0.376070 |
| 27 | 1 | -6.894534 | -3.768833 | -0.709480 |
| 28 | 6 | -5.634181 | -2.038684 | -0.550302 |
| 29 | 6 | -4.396759 | -1.556290 | -0.109411 |
| 30 | 8 | 1.559214  | 1.434773  | 0.952482  |
| 31 | 8 | -1.051427 | 1.279084  | 0.233791  |
| 32 | 1 | -2.040670 | 1.394175  | 0.087878  |
| 33 | 7 | -3.410291 | 2.240685  | 0.384150  |
| 34 | 6 | 0.715970  | 2.364820  | 1.367445  |
| 35 | 6 | -0.661210 | 2.303638  | 1.007769  |
| 36 | 6 | -1.571761 | 3.292762  | 1.473044  |
| 37 | 6 | -1.101576 | 4.344806  | 2.297661  |
| 38 | 1 | -1.806485 | 5.093350  | 2.651659  |
| 39 | 6 | 0.235670  | 4.406642  | 2.641780  |
| 40 | 1 | 0.602177  | 5.209988  | 3.274892  |
| 41 | 6 | 1.131969  | 3.424705  | 2.182287  |
| 42 | 1 | 2.182452  | 3.462402  | 2.456178  |
| 43 | 6 | -2.973525 | 3.195123  | 1.145009  |
| 44 | 1 | -3.650382 | 3.936711  | 1.591229  |
| 45 | 6 | -4.733625 | 2.027170  | 0.018605  |
| 46 | 6 | -5.732316 | 3.006920  | -0.083004 |
| 47 | 1 | -5.487529 | 4.039763  | 0.146626  |
| 48 | 6 | -7.018479 | 2.665937  | -0.501518 |
| 49 | 1 | -7.782391 | 3.434566  | -0.575800 |
| 50 | 6 | -7.322487 | 1.348094  | -0.842830 |
| 51 | 1 | -8.322541 | 1.088014  | -1.180749 |
| 52 | 6 | -6.343395 | 0.349291  | -0.776553 |
| 53 | 6 | -5.069774 | 0.701288  | -0.337171 |
| 54 | 6 | -0.327581 | -0.139874 | -2.954206 |
| 55 | 1 | -1.232440 | -0.166222 | -3.554786 |
| 56 | 6 | 5.874697  | -0.014176 | 0.049788  |
| 57 | 1 | 6.899548  | 0.003216  | 0.409032  |
| 58 | 7 | 3.960422  | 1.377438  | -0.597494 |
| 59 | 7 | 1.330789  | 1.326208  | -1.904536 |
| 60 | 6 | 5.252978  | 1.215633  | -0.155158 |
| 61 | 6 | 5.895235  | 2.501569  | -0.023644 |
| 62 | 1 | 6.917619  | 2.652836  | 0.299455  |
| 63 | 6 | 4.988209  | 3.437924  | -0.424144 |
| 64 | 1 | 5.120481  | 4.510294  | -0.496991 |
| 65 | 6 | 3.787896  | 2.728091  | -0.799119 |
| 66 | 6 | 2.670574  | 3.325725  | -1.382172 |
| 67 | 1 | 2.702640  | 4.406528  | -1.488725 |
| 68 | 6 | 1.563947  | 2.681063  | -1.935700 |
| 69 | 6 | 0.538117  | 3.341188  | -2.710658 |
| 70 | 1 | 0.495881  | 4.406407  | -2.901110 |
| 71 | 6 | -0.302921 | 2.368742  | -3.163362 |
| 72 | 1 | -1.174972 | 2.476963  | -3.796218 |
| 73 | 6 | 0.207391  | 1.113115  | -2.665698 |
| 74 | 7 | 4.048421  | -1.477509 | -0.698027 |



|    |   |           |           |           |
|----|---|-----------|-----------|-----------|
| 75 | 7 | 1.399253  | -1.536217 | -1.888165 |
| 76 | 6 | 5.323105  | -1.262082 | -0.232731 |
| 77 | 6 | 6.025430  | -2.517627 | -0.105140 |
| 78 | 1 | 7.052334  | -2.621782 | 0.222355  |
| 79 | 6 | 5.159486  | -3.495019 | -0.493373 |
| 80 | 1 | 5.333602  | -4.562220 | -0.552393 |
| 81 | 6 | 3.928521  | -2.837002 | -0.866452 |
| 82 | 6 | 2.807516  | -3.490810 | -1.375555 |
| 83 | 1 | 2.865933  | -4.573014 | -1.450702 |
| 84 | 6 | 1.657480  | -2.889818 | -1.886929 |
| 85 | 6 | 0.613046  | -3.591977 | -2.590612 |
| 86 | 1 | 0.587251  | -4.662776 | -2.750530 |
| 87 | 6 | -0.261778 | -2.648637 | -3.045190 |
| 88 | 1 | -1.148626 | -2.793320 | -3.649823 |
| 89 | 6 | 0.239607  | -1.367082 | -2.613636 |

---

I.  $(\text{XbicH}_2)_2\text{Zr}$ , ground state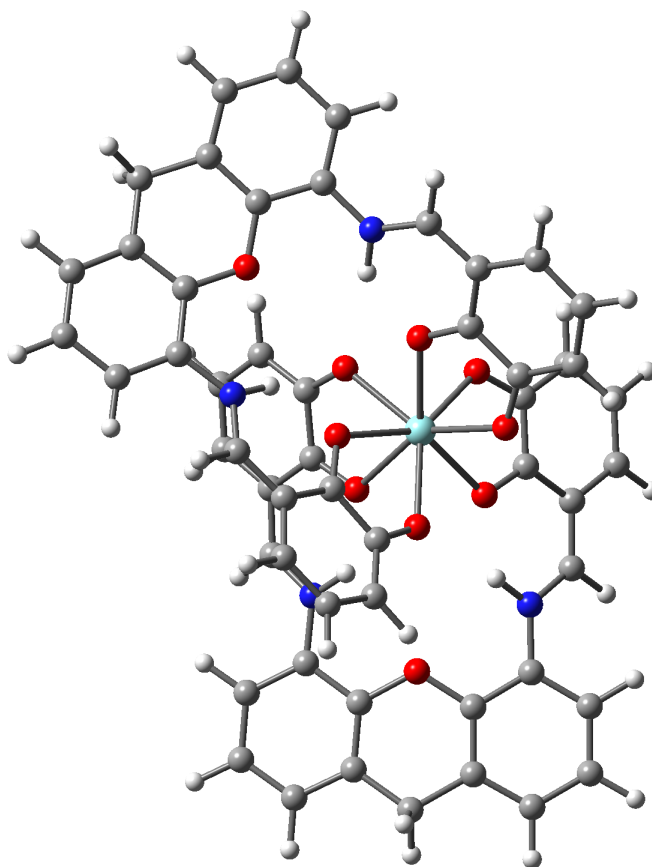

Optimized energy =  $-3098.01485290$  a.u.

| Center Number | Atomic Number | Coordinates (Å) |           |           |
|---------------|---------------|-----------------|-----------|-----------|
|               |               | X               | Y         | Z         |
| 1             | 40            | 0.000000        | 0.000000  | 1.078093  |
| 2             | 8             | 1.459417        | 0.054955  | 2.683298  |
| 3             | 1             | 0.054018        | -3.807979 | 1.333371  |
| 4             | 8             | 0.416998        | -2.122062 | 1.798942  |
| 5             | 1             | 1.015289        | -2.760728 | -1.468485 |
| 6             | 8             | 1.541550        | 1.285122  | 0.187382  |
| 7             | 8             | 1.114016        | -1.150181 | -0.589515 |
| 8             | 8             | 0.023864        | -5.003152 | -0.932664 |
| 9             | 7             | 0.217099        | -4.729389 | 1.772135  |
| 10            | 7             | 1.530511        | -3.151976 | -2.270386 |
| 11            | 6             | 1.744395        | -1.029557 | 3.367091  |
| 12            | 6             | 1.165586        | -2.243238 | 2.842711  |
| 13            | 6             | 1.453152        | -3.512228 | 3.454863  |
| 14            | 6             | 2.290068        | -3.545591 | 4.624313  |
| 15            | 1             | 2.501116        | -4.501418 | 5.097026  |
| 16            | 6             | 2.806807        | -2.376701 | 5.117590  |
| 17            | 1             | 3.438192        | -2.397359 | 6.002008  |
| 18            | 6             | 2.547480        | -1.119333 | 4.494818  |
| 19            | 1             | 2.986334        | -0.210780 | 4.897594  |
| 20            | 6             | 0.949447        | -4.683809 | 2.890372  |
| 21            | 1             | 1.177922        | -5.642216 | 3.352255  |
| 22            | 6             | 2.372898        | 0.808300  | -0.705034 |

|    |   |           |           |           |
|----|---|-----------|-----------|-----------|
| 23 | 6 | 2.106701  | -0.545052 | -1.145117 |
| 24 | 6 | 2.918556  | -1.160111 | -2.163336 |
| 25 | 6 | 4.044947  | -0.431844 | -2.687349 |
| 26 | 1 | 4.668839  | -0.895540 | -3.447095 |
| 27 | 6 | 4.295261  | 0.835599  | -2.233602 |
| 28 | 1 | 5.142123  | 1.390886  | -2.628877 |
| 29 | 6 | 3.468602  | 1.463119  | -1.253684 |
| 30 | 1 | 3.695904  | 2.470669  | -0.916140 |
| 31 | 6 | 2.572258  | -2.409306 | -2.674686 |
| 32 | 1 | 3.173937  | -2.831708 | -3.475666 |
| 33 | 6 | -0.360250 | -5.894091 | 1.236355  |
| 34 | 6 | -0.474956 | -6.034850 | -0.161466 |
| 35 | 6 | -1.050992 | -7.177471 | -0.719821 |
| 36 | 6 | -1.483889 | -8.201814 | 0.128873  |
| 37 | 1 | -1.924119 | -9.094848 | -0.307399 |
| 38 | 6 | -1.374805 | -8.078413 | 1.511374  |
| 39 | 1 | -1.734782 | -8.868963 | 2.162543  |
| 40 | 6 | -0.830397 | -6.920653 | 2.062794  |
| 41 | 1 | -0.792227 | -6.791528 | 3.139582  |
| 42 | 6 | 1.030931  | -4.273218 | -2.959012 |
| 43 | 6 | 1.276084  | -4.461463 | -4.325717 |
| 44 | 1 | 1.828998  | -3.709756 | -4.878202 |
| 45 | 6 | 0.783181  | -5.581966 | -4.989234 |
| 46 | 1 | 0.987831  | -5.714032 | -6.047237 |
| 47 | 6 | -0.000000 | -6.505915 | -4.303552 |
| 48 | 1 | -0.408401 | -7.370093 | -4.821080 |
| 49 | 6 | -0.297753 | -6.323851 | -2.949615 |
| 50 | 6 | 0.237791  | -5.221903 | -2.278351 |
| 51 | 6 | -1.218267 | -7.270869 | -2.216970 |
| 52 | 1 | -2.262244 | -7.039816 | -2.482531 |
| 53 | 1 | -1.044887 | -8.300790 | -2.552956 |
| 54 | 8 | -1.459417 | -0.054955 | 2.683298  |
| 55 | 1 | -0.054018 | 3.807979  | 1.333371  |
| 56 | 8 | -0.416998 | 2.122062  | 1.798942  |
| 57 | 1 | -1.015289 | 2.760728  | -1.468485 |
| 58 | 8 | -1.541550 | -1.285122 | 0.187382  |
| 59 | 8 | -1.114016 | 1.150181  | -0.589515 |
| 60 | 8 | -0.023864 | 5.003152  | -0.932664 |
| 61 | 7 | -0.217099 | 4.729389  | 1.772135  |
| 62 | 7 | -1.530511 | 3.151976  | -2.270386 |
| 63 | 6 | -1.744395 | 1.029557  | 3.367091  |
| 64 | 6 | -1.165586 | 2.243238  | 2.842711  |
| 65 | 6 | -1.453152 | 3.512228  | 3.454863  |
| 66 | 6 | -2.290068 | 3.545591  | 4.624313  |
| 67 | 1 | -2.501116 | 4.501418  | 5.097026  |
| 68 | 6 | -2.806807 | 2.376701  | 5.117590  |
| 69 | 1 | -3.438192 | 2.397359  | 6.002008  |
| 70 | 6 | -2.547480 | 1.119333  | 4.494818  |
| 71 | 1 | -2.986334 | 0.210780  | 4.897594  |
| 72 | 6 | -0.949447 | 4.683809  | 2.890372  |
| 73 | 1 | -1.177922 | 5.642216  | 3.352255  |
| 74 | 6 | -2.372898 | -0.808300 | -0.705034 |
| 75 | 6 | -2.106701 | 0.545052  | -1.145117 |
| 76 | 6 | -2.918556 | 1.160111  | -2.163336 |
| 77 | 6 | -4.044947 | 0.431844  | -2.687349 |
| 78 | 1 | -4.668839 | 0.895540  | -3.447095 |
| 79 | 6 | -4.295261 | -0.835599 | -2.233602 |
| 80 | 1 | -5.142123 | -1.390886 | -2.628877 |

|     |   |           |           |           |
|-----|---|-----------|-----------|-----------|
| 81  | 6 | -3.468602 | -1.463119 | -1.253684 |
| 82  | 1 | -3.695904 | -2.470669 | -0.916140 |
| 83  | 6 | -2.572258 | 2.409306  | -2.674686 |
| 84  | 1 | -3.173937 | 2.831708  | -3.475666 |
| 85  | 6 | 0.360250  | 5.894091  | 1.236355  |
| 86  | 6 | 0.474956  | 6.034850  | -0.161466 |
| 87  | 6 | 1.050992  | 7.177471  | -0.719821 |
| 88  | 6 | 1.483889  | 8.201814  | 0.128873  |
| 89  | 1 | 1.924119  | 9.094848  | -0.307399 |
| 90  | 6 | 1.374805  | 8.078413  | 1.511374  |
| 91  | 1 | 1.734782  | 8.868963  | 2.162543  |
| 92  | 6 | 0.830397  | 6.920653  | 2.062794  |
| 93  | 1 | 0.792227  | 6.791528  | 3.139582  |
| 94  | 6 | -1.030931 | 4.273218  | -2.959012 |
| 95  | 6 | -1.276084 | 4.461463  | -4.325717 |
| 96  | 1 | -1.828998 | 3.709756  | -4.878202 |
| 97  | 6 | -0.783181 | 5.581966  | -4.989234 |
| 98  | 1 | -0.987831 | 5.714032  | -6.047237 |
| 99  | 6 | 0.000000  | 6.505915  | -4.303552 |
| 100 | 1 | 0.408401  | 7.370093  | -4.821080 |
| 101 | 6 | 0.297753  | 6.323851  | -2.949615 |
| 102 | 6 | -0.237791 | 5.221903  | -2.278351 |
| 103 | 6 | 1.218267  | 7.270869  | -2.216970 |
| 104 | 1 | 2.262244  | 7.039816  | -2.482531 |
| 105 | 1 | 1.044887  | 8.300790  | -2.552956 |

---

J.  $(\text{XbicH}_2)_2\text{Zr}$ , OH tautomer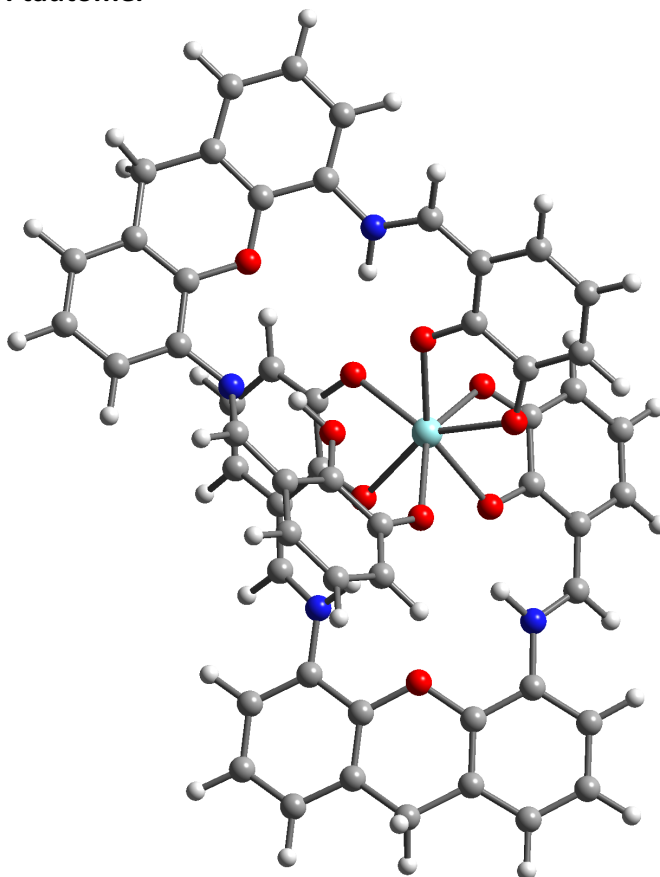

Optimized energy =  $-3098.00907317$  a.u.

| Center Number | Atomic Number | Coordinates (Å) |           |           |
|---------------|---------------|-----------------|-----------|-----------|
|               |               | X               | Y         | Z         |
| 1             | 40            | -0.039660       | 1.157180  | -0.087682 |
| 2             | 8             | 5.067196        | -0.944595 | 0.084524  |
| 3             | 6             | 7.410886        | -2.162830 | -1.102169 |
| 4             | 1             | 8.435273        | -2.467680 | -0.851945 |
| 5             | 1             | 7.272597        | -2.425790 | -2.163110 |
| 6             | 8             | -0.129927       | 2.838124  | 1.285148  |
| 7             | 8             | 2.060655        | 1.794709  | 0.441466  |
| 8             | 7             | 4.714411        | 1.744614  | 0.300766  |
| 9             | 1             | 3.810449        | 1.286330  | 0.115644  |
| 10            | 6             | 0.967193        | 3.468875  | 1.634083  |
| 11            | 6             | 2.187018        | 2.867935  | 1.159569  |
| 12            | 6             | 3.458022        | 3.442454  | 1.491820  |
| 13            | 6             | 3.494685        | 4.629082  | 2.303085  |
| 14            | 1             | 4.456760        | 5.068640  | 2.553306  |
| 15            | 6             | 2.321054        | 5.185765  | 2.740667  |
| 16            | 1             | 2.344450        | 6.084272  | 3.351564  |
| 17            | 6             | 1.057403        | 4.613975  | 2.415329  |
| 18            | 1             | 0.141262        | 5.069580  | 2.780479  |
| 19            | 6             | 4.640640        | 2.860167  | 1.028430  |
| 20            | 1             | 5.591958        | 3.325062  | 1.278412  |
| 21            | 6             | 5.904947        | 1.241377  | -0.264839 |
| 22            | 6             | 6.910093        | 2.103336  | -0.715130 |

|    |   |           |           |           |
|----|---|-----------|-----------|-----------|
| 23 | 1 | 6.745168  | 3.175369  | -0.678569 |
| 24 | 6 | 8.095217  | 1.591374  | -1.239334 |
| 25 | 1 | 8.870432  | 2.268277  | -1.584781 |
| 26 | 6 | 8.264392  | 0.213502  | -1.345550 |
| 27 | 1 | 9.180105  | -0.192787 | -1.767959 |
| 28 | 6 | 7.260873  | -0.670256 | -0.934967 |
| 29 | 6 | 6.086834  | -0.152126 | -0.381987 |
| 30 | 8 | -1.135735 | 0.243302  | 1.554288  |
| 31 | 8 | 1.140252  | -0.740031 | 0.911040  |
| 32 | 1 | 2.042095  | -1.146476 | 0.753197  |
| 33 | 7 | 3.146981  | -2.355682 | 1.401953  |
| 34 | 6 | -0.647192 | -0.659581 | 2.377542  |
| 35 | 6 | 0.610724  | -1.225930 | 2.066962  |
| 36 | 6 | 1.251752  | -2.178598 | 2.871576  |
| 37 | 6 | 0.592444  | -2.601148 | 4.053566  |
| 38 | 1 | 1.068728  | -3.338818 | 4.694065  |
| 39 | 6 | -0.648044 | -2.070693 | 4.374829  |
| 40 | 1 | -1.152392 | -2.394324 | 5.281639  |
| 41 | 6 | -1.268265 | -1.112022 | 3.553256  |
| 42 | 1 | -2.233075 | -0.690925 | 3.821550  |
| 43 | 6 | 2.534325  | -2.721050 | 2.485775  |
| 44 | 1 | 2.974297  | -3.471282 | 3.155869  |
| 45 | 6 | 4.307023  | -3.015816 | 0.976679  |
| 46 | 6 | 4.504743  | -4.393190 | 1.165381  |
| 47 | 1 | 3.731181  | -4.967952 | 1.664807  |
| 48 | 6 | 5.644645  | -5.031504 | 0.682416  |
| 49 | 1 | 5.776094  | -6.098226 | 0.838856  |
| 50 | 6 | 6.596211  | -4.303102 | -0.025187 |
| 51 | 1 | 7.480314  | -4.795919 | -0.422386 |
| 52 | 6 | 6.420256  | -2.935235 | -0.262273 |
| 53 | 6 | 5.286515  | -2.300127 | 0.249210  |
| 54 | 8 | 1.259205  | 0.291351  | -1.614518 |
| 55 | 1 | -2.751651 | -1.455377 | -1.051696 |
| 56 | 8 | -1.166711 | -0.527771 | -1.170945 |
| 57 | 1 | -3.862021 | 1.285904  | 0.018442  |
| 58 | 8 | -0.112865 | 2.690329  | -1.585499 |
| 59 | 8 | -2.205987 | 1.800518  | -0.394296 |
| 60 | 8 | -4.972811 | -1.019283 | 0.033237  |
| 61 | 7 | -3.130189 | -2.259917 | -1.571542 |
| 62 | 7 | -4.801828 | 1.696811  | -0.106191 |
| 63 | 6 | 0.778130  | -0.593144 | -2.458194 |
| 64 | 6 | -0.562794 | -1.057482 | -2.180728 |
| 65 | 6 | -1.170498 | -2.074576 | -2.998003 |
| 66 | 6 | -0.451508 | -2.565656 | -4.144556 |
| 67 | 1 | -0.910858 | -3.324168 | -4.773068 |
| 68 | 6 | 0.803719  | -2.085862 | -4.407106 |
| 69 | 1 | 1.353277  | -2.457367 | -5.268074 |
| 70 | 6 | 1.426120  | -1.110077 | -3.571868 |
| 71 | 1 | 2.425990  | -0.754152 | -3.804259 |
| 72 | 6 | -2.399249 | -2.624219 | -2.635546 |
| 73 | 1 | -2.810744 | -3.427188 | -3.241937 |
| 74 | 6 | -1.220953 | 3.366674  | -1.804411 |
| 75 | 6 | -2.388196 | 2.832159  | -1.147648 |
| 76 | 6 | -3.681096 | 3.417391  | -1.376479 |
| 77 | 6 | -3.777882 | 4.581698  | -2.215047 |
| 78 | 1 | -4.751720 | 5.036044  | -2.378678 |
| 79 | 6 | -2.647540 | 5.091505  | -2.797234 |
| 80 | 1 | -2.716651 | 5.971928  | -3.430447 |

|     |   |           |           |           |
|-----|---|-----------|-----------|-----------|
| 81  | 6 | -1.368949 | 4.486905  | -2.606617 |
| 82  | 1 | -0.492460 | 4.897335  | -3.099969 |
| 83  | 6 | -4.817594 | 2.820305  | -0.830029 |
| 84  | 1 | -5.797035 | 3.254643  | -1.019960 |
| 85  | 6 | -4.212571 | -2.995802 | -1.052081 |
| 86  | 6 | -5.153857 | -2.366518 | -0.209218 |
| 87  | 6 | -6.212709 | -3.087704 | 0.348360  |
| 88  | 6 | -6.361311 | -4.439181 | 0.023017  |
| 89  | 1 | -7.192380 | -4.995251 | 0.448988  |
| 90  | 6 | -5.444312 | -5.074430 | -0.809294 |
| 91  | 1 | -5.548515 | -6.131135 | -1.035324 |
| 92  | 6 | -4.364644 | -4.362015 | -1.324149 |
| 93  | 1 | -3.615134 | -4.876466 | -1.915273 |
| 94  | 6 | -5.928520 | 1.107586  | 0.494737  |
| 95  | 6 | -6.967796 | 1.886569  | 1.014686  |
| 96  | 1 | -6.878713 | 2.967983  | 0.994720  |
| 97  | 6 | -8.086216 | 1.281774  | 1.584197  |
| 98  | 1 | -8.887643 | 1.895668  | 1.983366  |
| 99  | 6 | -8.155500 | -0.106387 | 1.667547  |
| 100 | 1 | -9.016787 | -0.584151 | 2.127419  |
| 101 | 6 | -7.116269 | -0.907938 | 1.183414  |
| 102 | 6 | -6.014591 | -0.296412 | 0.582217  |
| 103 | 6 | -7.147137 | -2.410372 | 1.322478  |
| 104 | 1 | -6.862098 | -2.687284 | 2.350044  |
| 105 | 1 | -8.169975 | -2.782055 | 1.184778  |

---

K.  $(\text{XbicH}_2)_2\text{Zr}$ , twist transition state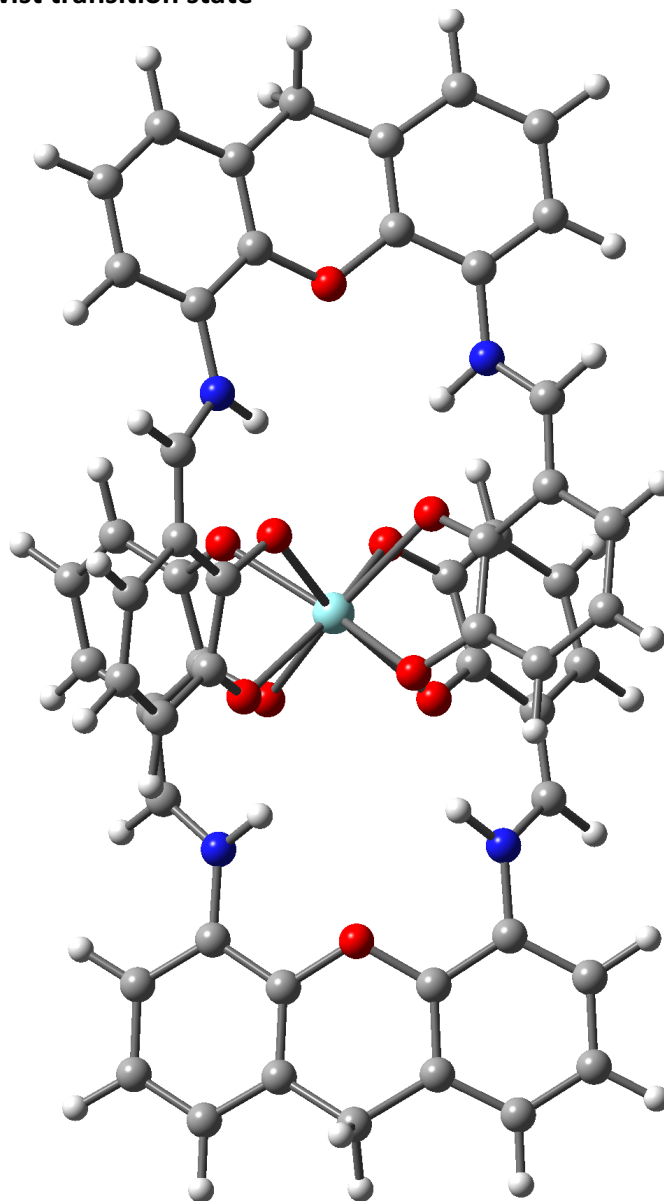

Optimized energy =  $-3097.99117681$  a.u.

Imaginary frequency =  $(13.1 \text{ cm}^{-1})i$

| Center Number | Atomic Number | Coordinates ( $\text{\AA}$ ) |           |           |
|---------------|---------------|------------------------------|-----------|-----------|
|               |               | X                            | Y         | Z         |
| 1             | 40            | 0.000065                     | 0.129465  | 0.000866  |
| 2             | 8             | -0.354981                    | -0.907389 | 1.901518  |
| 3             | 1             | 3.372724                     | -1.687381 | -0.091357 |
| 4             | 8             | 1.672923                     | -1.415314 | 0.377949  |
| 5             | 1             | 3.607515                     | 1.309974  | 0.901494  |
| 6             | 8             | -0.783302                    | 1.689993  | 1.293337  |
| 7             | 8             | 1.766062                     | 1.105780  | 1.097893  |
| 8             | 8             | 5.355448                     | -0.013217 | -0.241640 |
| 9             | 7             | 4.092696                     | -2.388306 | 0.145056  |
| 10            | 7             | 4.285571                     | 1.931421  | 1.359648  |



|    |   |           |           |           |
|----|---|-----------|-----------|-----------|
| 11 | 6 | 0.402485  | -1.909749 | 2.272913  |
| 12 | 6 | 1.555171  | -2.152223 | 1.434572  |
| 13 | 6 | 2.524249  | -3.147442 | 1.810518  |
| 14 | 6 | 2.268044  | -3.977023 | 2.957850  |
| 15 | 1 | 2.991520  | -4.741248 | 3.229930  |
| 16 | 6 | 1.136898  | -3.766578 | 3.701014  |
| 17 | 1 | 0.941012  | -4.385251 | 4.573014  |
| 18 | 6 | 0.210370  | -2.732535 | 3.375994  |
| 19 | 1 | -0.660256 | -2.564078 | 4.003912  |
| 20 | 6 | 3.743873  | -3.212915 | 1.136002  |
| 21 | 1 | 4.500822  | -3.929047 | 1.451038  |
| 22 | 6 | 0.029427  | 2.290155  | 2.133264  |
| 23 | 6 | 1.440876  | 1.999639  | 1.962964  |
| 24 | 6 | 2.429662  | 2.728360  | 2.720384  |
| 25 | 6 | 1.988463  | 3.621080  | 3.762512  |
| 26 | 1 | 2.730257  | 4.149769  | 4.355547  |
| 27 | 6 | 0.648528  | 3.815414  | 3.956810  |
| 28 | 1 | 0.309542  | 4.494579  | 4.734874  |
| 29 | 6 | -0.331756 | 3.169297  | 3.142888  |
| 30 | 1 | -1.387412 | 3.370858  | 3.302370  |
| 31 | 6 | 3.772543  | 2.668456  | 2.360682  |
| 32 | 1 | 4.480802  | 3.289442  | 2.902496  |
| 33 | 6 | 5.347891  | -2.375352 | -0.493585 |
| 34 | 6 | 5.993700  | -1.144043 | -0.712071 |
| 35 | 6 | 7.232552  | -1.090151 | -1.353138 |
| 36 | 6 | 7.843797  | -2.287626 | -1.739977 |
| 37 | 1 | 8.813101  | -2.248197 | -2.230426 |
| 38 | 6 | 7.222020  | -3.514370 | -1.517522 |
| 39 | 1 | 7.699378  | -4.435686 | -1.836678 |
| 40 | 6 | 5.968515  | -3.556674 | -0.908625 |
| 41 | 1 | 5.449713  | -4.500223 | -0.769794 |
| 42 | 6 | 5.555785  | 2.125776  | 0.786166  |
| 43 | 6 | 6.291777  | 3.300897  | 0.993707  |
| 44 | 1 | 5.864681  | 4.106554  | 1.579904  |
| 45 | 6 | 7.551815  | 3.462760  | 0.423609  |
| 46 | 1 | 8.107293  | 4.378299  | 0.602519  |
| 47 | 6 | 8.078133  | 2.471577  | -0.400124 |
| 48 | 1 | 9.051186  | 2.603308  | -0.865937 |
| 49 | 6 | 7.349795  | 1.307924  | -0.663344 |
| 50 | 6 | 6.106068  | 1.132668  | -0.052379 |
| 51 | 6 | 7.856979  | 0.257183  | -1.624035 |
| 52 | 1 | 7.625108  | 0.566115  | -2.655957 |
| 53 | 1 | 8.949950  | 0.188581  | -1.567858 |
| 54 | 8 | 0.783904  | 1.690125  | -1.291283 |
| 55 | 1 | -3.607106 | 1.309958  | -0.901247 |
| 56 | 8 | -1.765683 | 1.106152  | -1.096402 |
| 57 | 1 | -3.373024 | -1.687405 | 0.092199  |
| 58 | 8 | 0.355497  | -0.906641 | -1.900087 |
| 59 | 8 | -1.673450 | -1.414607 | -0.377359 |
| 60 | 8 | -5.355553 | -0.012880 | 0.241848  |
| 61 | 7 | -4.285079 | 1.931334  | -1.359667 |
| 62 | 7 | -4.093151 | -2.387890 | -0.145071 |
| 63 | 6 | -0.028563 | 2.289957  | -2.131729 |
| 64 | 6 | -1.440128 | 1.999698  | -1.961675 |
| 65 | 6 | -2.428645 | 2.728220  | -2.719681 |
| 66 | 6 | -1.987077 | 3.620433  | -3.762079 |
| 67 | 1 | -2.728651 | 4.148941  | -4.355548 |
| 68 | 6 | -0.647064 | 3.814396  | -3.956207 |

|     |   |           |           |           |
|-----|---|-----------|-----------|-----------|
| 69  | 1 | -0.307790 | 4.493103  | -4.734546 |
| 70  | 6 | 0.332940  | 3.168505  | -3.141770 |
| 71  | 1 | 1.388659  | 3.369781  | -3.301192 |
| 72  | 6 | -3.771683 | 2.668309  | -2.360571 |
| 73  | 1 | -4.479808 | 3.289111  | -2.902768 |
| 74  | 6 | -0.402507 | -1.908293 | -2.272361 |
| 75  | 6 | -1.555565 | -2.150841 | -1.434483 |
| 76  | 6 | -2.524830 | -3.145534 | -1.811349 |
| 77  | 6 | -2.268696 | -3.974361 | -2.959237 |
| 78  | 1 | -2.992397 | -4.738134 | -3.231983 |
| 79  | 6 | -1.137270 | -3.763867 | -3.701958 |
| 80  | 1 | -0.941378 | -4.382035 | -4.574315 |
| 81  | 6 | -0.210410 | -2.730458 | -3.375924 |
| 82  | 1 | 0.660556  | -2.562002 | -4.003371 |
| 83  | 6 | -3.744498 | -3.211433 | -1.136940 |
| 84  | 1 | -4.501562 | -3.927115 | -1.452735 |
| 85  | 6 | -5.555572 | 2.125751  | -0.786809 |
| 86  | 6 | -6.106096 | 1.132945  | 0.051914  |
| 87  | 6 | -7.350104 | 1.308255  | 0.662280  |
| 88  | 6 | -8.078565 | 2.471625  | 0.398165  |
| 89  | 1 | -9.051875 | 2.603382  | 0.863434  |
| 90  | 6 | -7.552067 | 3.462501  | -0.425838 |
| 91  | 1 | -8.107677 | 4.377812  | -0.605502 |
| 92  | 6 | -6.291715 | 3.300634  | -0.995248 |
| 93  | 1 | -5.864523 | 4.106088  | -1.581653 |
| 94  | 6 | -5.348568 | -2.375027 | 0.493184  |
| 95  | 6 | -5.969470 | -3.556333 | 0.907826  |
| 96  | 1 | -5.450769 | -4.499936 | 0.768944  |
| 97  | 6 | -7.223149 | -3.513912 | 1.516381  |
| 98  | 1 | -7.700744 | -4.435201 | 1.835262  |
| 99  | 6 | -7.844823 | -2.287105 | 1.738837  |
| 100 | 1 | -8.814273 | -2.247621 | 2.228992  |
| 101 | 6 | -7.233277 | -1.089664 | 1.352359  |
| 102 | 6 | -5.994236 | -1.143682 | 0.711689  |
| 103 | 6 | -7.857447 | 0.257799  | 1.623200  |
| 104 | 1 | -7.625378 | 0.566828  | 2.655048  |
| 105 | 1 | -8.950435 | 0.189408  | 1.567162  |

---

L.  $(\text{XbicH}_2)_2\text{Zr}$ , OH tautomer, twist transition state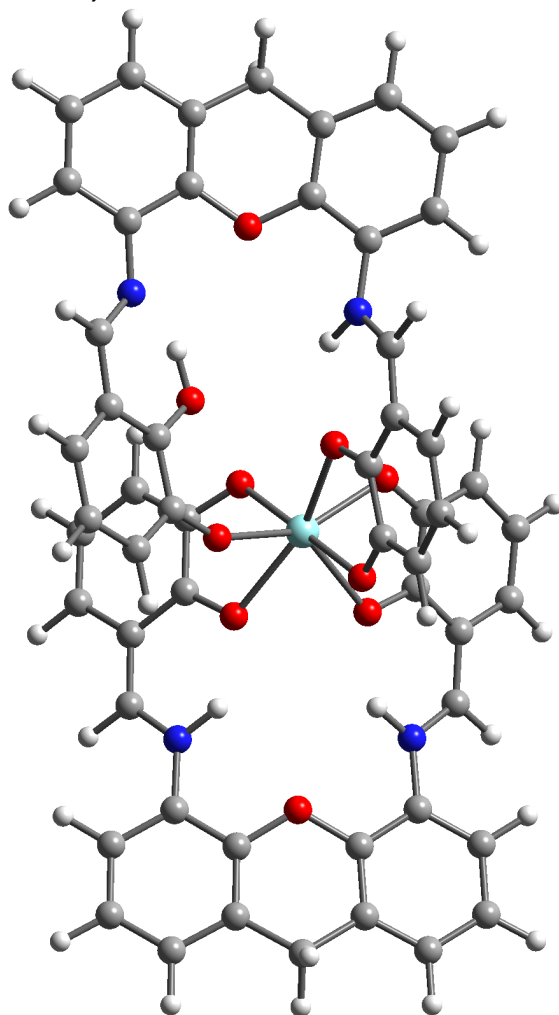

Optimized energy =  $-3097.99025870$  a.u.

Imaginary frequency =  $(11.2 \text{ cm}^{-1})i$

| Center Number | Atomic Number | Coordinates ( $\text{\AA}$ ) |          |           |
|---------------|---------------|------------------------------|----------|-----------|
|               |               | X                            | Y        | Z         |
| 1             | 40            | -0.323921                    | 0.406232 | -0.239866 |
| 2             | 8             | 5.835350                     | 0.011180 | -0.317744 |
| 3             | 6             | 8.412214                     | 0.626709 | -1.410539 |
| 4             | 1             | 9.471966                     | 0.825053 | -1.208714 |
| 5             | 1             | 8.292830                     | 0.706099 | -2.503147 |
| 6             | 8             | -0.879763                    | 1.307112 | 1.628002  |
| 7             | 8             | 1.574565                     | 1.127861 | 0.742876  |
| 8             | 7             | 4.211066                     | 1.847057 | 0.949247  |
| 9             | 1             | 3.542088                     | 1.271706 | 0.426366  |
| 10            | 6             | 0.071344                     | 1.731629 | 2.439709  |
| 11            | 6             | 1.419446                     | 1.654805 | 1.911413  |
| 12            | 6             | 2.510491                     | 2.199793 | 2.673998  |
| 13            | 6             | 2.253092                     | 2.728859 | 3.988066  |
| 14            | 1             | 3.084152                     | 3.125685 | 4.565578  |
| 15            | 6             | 0.977925                     | 2.734111 | 4.484203  |

|    |   |           |           |           |
|----|---|-----------|-----------|-----------|
| 16 | 1 | 0.782942  | 3.130651  | 5.476933  |
| 17 | 6 | -0.116326 | 2.244040  | 3.712943  |
| 18 | 1 | -1.125890 | 2.280122  | 4.113204  |
| 19 | 6 | 3.792218  | 2.309065  | 2.131143  |
| 20 | 1 | 4.551585  | 2.835445  | 2.706069  |
| 21 | 6 | 5.454660  | 2.238769  | 0.386187  |
| 22 | 6 | 5.879673  | 3.568446  | 0.482266  |
| 23 | 1 | 5.210560  | 4.303961  | 0.917945  |
| 24 | 6 | 7.133668  | 3.946830  | 0.005254  |
| 25 | 1 | 7.453394  | 4.981055  | 0.087239  |
| 26 | 6 | 7.962165  | 2.999128  | -0.592073 |
| 27 | 1 | 8.940291  | 3.289462  | -0.967669 |
| 28 | 6 | 7.549815  | 1.670767  | -0.734153 |
| 29 | 6 | 6.294576  | 1.297875  | -0.241306 |
| 30 | 8 | 0.067813  | -1.328395 | 0.835459  |
| 31 | 8 | 2.604607  | -1.481393 | -0.063778 |
| 32 | 1 | 3.583507  | -1.629147 | -0.216868 |
| 33 | 7 | 4.981444  | -2.411961 | 0.253760  |
| 34 | 6 | 0.898522  | -2.183588 | 1.404862  |
| 35 | 6 | 2.246328  | -2.281451 | 0.950704  |
| 36 | 6 | 3.150967  | -3.181656 | 1.575794  |
| 37 | 6 | 2.698199  | -4.010376 | 2.632693  |
| 38 | 1 | 3.400192  | -4.693343 | 3.105355  |
| 39 | 6 | 1.384305  | -3.934500 | 3.054297  |
| 40 | 1 | 1.030862  | -4.567515 | 3.863780  |
| 41 | 6 | 0.497392  | -3.025482 | 2.448838  |
| 42 | 1 | -0.532275 | -2.948258 | 2.787247  |
| 43 | 6 | 4.543196  | -3.185561 | 1.195256  |
| 44 | 1 | 5.224848  | -3.827661 | 1.770871  |
| 45 | 6 | 6.314985  | -2.299988 | -0.125862 |
| 46 | 6 | 7.219795  | -3.363404 | -0.243122 |
| 47 | 1 | 6.884428  | -4.368402 | -0.003840 |
| 48 | 6 | 8.520795  | -3.137454 | -0.696684 |
| 49 | 1 | 9.212427  | -3.970295 | -0.786441 |
| 50 | 6 | 8.928009  | -1.853255 | -1.055262 |
| 51 | 1 | 9.936491  | -1.682555 | -1.423963 |
| 52 | 6 | 8.042701  | -0.771164 | -0.965225 |
| 53 | 6 | 6.756954  | -1.008769 | -0.487710 |
| 54 | 8 | 0.268860  | -0.551663 | -2.052667 |
| 55 | 1 | -3.679572 | -1.584994 | -0.483734 |
| 56 | 8 | -2.010823 | -1.040727 | -0.900423 |
| 57 | 1 | -4.062849 | 1.473964  | -0.438717 |
| 58 | 8 | 0.204500  | 2.175593  | -1.338121 |
| 59 | 8 | -2.239408 | 1.523057  | -0.762575 |
| 60 | 8 | -5.689773 | -0.314015 | 0.271903  |
| 61 | 7 | -4.260198 | -2.397916 | -0.736241 |
| 62 | 7 | -4.835376 | 2.102153  | -0.696540 |
| 63 | 6 | -0.379826 | -1.616514 | -2.477154 |
| 64 | 6 | -1.654811 | -1.857992 | -1.835912 |
| 65 | 6 | -2.479611 | -2.955737 | -2.272668 |
| 66 | 6 | -2.005822 | -3.813302 | -3.326017 |
| 67 | 1 | -2.627023 | -4.645264 | -3.647724 |
| 68 | 6 | -0.786740 | -3.571524 | -3.899718 |
| 69 | 1 | -0.423389 | -4.219831 | -4.692407 |
| 70 | 6 | 0.026455  | -2.475282 | -3.486118 |
| 71 | 1 | 0.983825  | -2.293879 | -3.965981 |
| 72 | 6 | -3.725678 | -3.172513 | -1.687394 |
| 73 | 1 | -4.334228 | -4.008315 | -2.024732 |

|     |   |           |           |           |
|-----|---|-----------|-----------|-----------|
| 74  | 6 | -0.738032 | 2.919399  | -1.879387 |
| 75  | 6 | -2.090012 | 2.558547  | -1.521813 |
| 76  | 6 | -3.200609 | 3.339084  | -1.999303 |
| 77  | 6 | -2.944490 | 4.437129  | -2.894404 |
| 78  | 1 | -3.782142 | 5.021687  | -3.265763 |
| 79  | 6 | -1.655429 | 4.738506  | -3.243095 |
| 80  | 1 | -1.457857 | 5.570129  | -3.914036 |
| 81  | 6 | -0.549586 | 3.991847  | -2.737956 |
| 82  | 1 | 0.464215  | 4.257858  | -3.023190 |
| 83  | 6 | -4.492956 | 3.080186  | -1.546159 |
| 84  | 1 | -5.304109 | 3.719136  | -1.886061 |
| 85  | 6 | -5.459995 | -2.657543 | -0.052996 |
| 86  | 6 | -6.199745 | -1.582416 | 0.480539  |
| 87  | 6 | -7.389437 | -1.806946 | 1.175162  |
| 88  | 6 | -7.860145 | -3.117415 | 1.307514  |
| 89  | 1 | -8.791210 | -3.290427 | 1.840920  |
| 90  | 6 | -7.140002 | -4.189665 | 0.787977  |
| 91  | 1 | -7.499426 | -5.205724 | 0.917935  |
| 92  | 6 | -5.935733 | -3.961850 | 0.126481  |
| 93  | 1 | -5.343577 | -4.798594 | -0.228685 |
| 94  | 6 | -6.074784 | 2.014167  | -0.033707 |
| 95  | 6 | -6.880526 | 3.144350  | 0.156814  |
| 96  | 1 | -6.527354 | 4.114601  | -0.174662 |
| 97  | 6 | -8.108549 | 3.040429  | 0.804410  |
| 98  | 1 | -8.722551 | 3.925438  | 0.939265  |
| 99  | 6 | -8.524190 | 1.811911  | 1.309474  |
| 100 | 1 | -9.470364 | 1.728327  | 1.837750  |
| 101 | 6 | -7.722235 | 0.674783  | 1.173105  |
| 102 | 6 | -6.512205 | 0.776070  | 0.482311  |
| 103 | 6 | -8.122209 | -0.641972 | 1.794251  |
| 104 | 1 | -7.911274 | -0.611915 | 2.875094  |
| 105 | 1 | -9.205861 | -0.787231 | 1.704855  |

---
